# Supplementary material for: Cell-Based Double-Screening Method to Identify a Reliable Candidate for Osteogenesis-Targeting Compounds
Source: MDPI journal article supplement (doi:10.3390/biomedicines10020426), 2022-02-11
Supplement: s1 [file s1]

## Cell-based double-screening method to identify a reliable candidate for osteogenesis-targeting compounds

Sho Fukuyasu, Hiroki Kayashima, Akihito Moribayashi, Shu Matsuoka, Atsuhiko Nagasaki, Hiroko Okawa, Hirofumi Yatani, Makio Saeki, Hiroshi Egusa

### Supplementary Materials and Methods

#### Supplementary Table S1

List of compounds in the Lopack<sup>1280</sup> (Sigma) library

| Rack No | Rack Pos | Name                                               | Sec Name                                                                                          | Rack No | Rack Pos | Name                              | Sec Name                                                                                                                                |
|---------|----------|----------------------------------------------------|---------------------------------------------------------------------------------------------------|---------|----------|-----------------------------------|-----------------------------------------------------------------------------------------------------------------------------------------|
| 01      | A02      | DL-alpha-Methyl-p-tyrosine                         | 4-Hydroxy-alpha-methylphenylalanine                                                               | 09      | A02      | ML-7                              | 1-(5-Iodonaphthalene-1-sulfonyl)-1H-hexahydro-1,4-diazepine hydrochloride                                                               |
| 01      | A03      | 6-Methoxy-1,2,3,4-tetrahydro-9H-pyrido[3,4b]indole |                                                                                                   | 09      | A03      | 3-Isobutyl-1-methylxanthine       | IBMX                                                                                                                                    |
| 01      | A04      | Acetamide                                          | Amide C2                                                                                          | 09      | A04      | Iproniazid phosphate              |                                                                                                                                         |
| 01      | A05      | Amantadine hydrochloride                           | Tricyclo[3.3.1.1 3,7]decan-1-amine hydrochloride                                                  | 09      | A05      | m-Iodobenzylguanidine hemisulfate | MIBG                                                                                                                                    |
| 01      | A06      | GABA                                               | gamma-Aminobutyric acid                                                                           | 09      | A06      | Imetit dihydrobromide             | S-[2-(Imidazol-4-yl)ethyl]isothiurea dihydrochloride                                                                                    |
| 01      | A07      | Gabaculine hydrochloride                           |                                                                                                   | 09      | A07      | JL-18                             | 8-Methyl-6-(4-methyl-1-piperazinyl)-11H-pyrido[2,3-b][1,4]benzodiazepine                                                                |
| 01      | A08      | O-(Carboxymethyl)hydroxylamine hemihydrochloride   | Aminooxyacetic acid; (Carboxymethoxy)amine hemihydrochloride                                      | 09      | A08      | Kenpaullone                       | NSC 664704                                                                                                                              |
| 01      | A09      | (±)-2-Amino-7-phosphonoheptanoic acid              | (±)-AP-7                                                                                          | 09      | A09      | LY-367,265                        | 1-[2-[4-(6-fluoro-1H-indol-3-yl)-3,6-dihydro-1(2H)-pyridinyl]ethyl]-5,6-dihydro-1H,4H-[1,2,5]thiadiazolo[4.3.2-ij]quinoline-2,2-dioxide |
| 01      | A10      | N-Acetylprocainamide hydrochloride                 | Acedainide; N-Acetylprocainamide hydrochloride; NAPA                                              | 09      | A10      | Leflunomide                       | 5-Methylisoxazole-4-(4-trifluoromethylcarboxanilide)                                                                                    |
| 01      | A11      | Actinonin                                          | 3-[[1-[(2-(Hydroxymethyl)-1-pyrrolidinyl)carbonyl]-2-methylpropyl]carbamoyl]octanohydroxamic acid | 09      | A11      | LFM-A13                           | alpha-Cyano-beta-hydroxy-beta-methyl-N-(2,5-dibromophenyl)propenamide                                                                   |
| 01      | B02      | N-Phenylanthranilic acid                           | Diphenylamine-2-carboxylic acid; DPC                                                              | 09      | B02      | (±)-Ibotenic acid                 | (±)-alpha-Amino-3-hydroxy-5-isoxazoleacetic acid                                                                                        |
| 01      | B03      | S-(4-Nitrobenzyl)-6-thioguanosine                  | 2-Amino-6-[(4-Nitrobenzyl)thio]-9-beta-D-ribofuranosylpurine                                      | 09      | B03      | Idazoxan hydrochloride            | RX 781094                                                                                                                               |
| 01      | B04      | Org 24598 lithium salt                             | R-(-)-N-Methyl-N-[3-[(4-trifluoromethyl)phenoxy]-3-phenyl-propyl]glycine lithium salt             | 09      | B04      | S(+)-Isoproterenol (+)-bitartrate |                                                                                                                                         |
| 01      | B05      | Aminophylline ethylenediamine                      | Theophylline ethylenediamine                                                                      | 09      | B05      | S(+)-Ibuprofen                    | S-(+)-2-(4-Isobutylphenyl)propionic acid                                                                                                |
| 01      | B06      | 3'-Azido-3'-deoxythymidine                         | Azidothymidine; AZT                                                                               | 09      | B06      | 1,5-Isoquinolinediol              | 1,5-Dihydroxyisoquinoline                                                                                                               |

|    |     |                                         |                                                                                              |    |     |                                                              |                                                                                                                                                               |
|----|-----|-----------------------------------------|----------------------------------------------------------------------------------------------|----|-----|--------------------------------------------------------------|---------------------------------------------------------------------------------------------------------------------------------------------------------------|
| 01 | B07 | AC 915 oxalate                          | N-(2-(3,4-dichlorophenyl)acetoxylethyl)pyrrolidine oxalate                                   | 09 | B07 | Kainic acid                                                  | 2-Carboxy-3-carboxymethyl-4-isopropenylpyrrolidine                                                                                                            |
| 01 | B08 | 5-(N,N-Dimethyl)amiloride hydrochloride | 3-Amino-N-(aminoiminoethyl)-5-(dimethylamino)-6-chloropyrazinecarboxamide hydrochloride; DMA | 09 | B08 | U-73343                                                      | 1-[6-[[[(17β)-3-Methoxyestra-1,3,5[10]-trien-17-yl)amino]hexyl]-2,5-pyrrolidinedione                                                                          |
| 01 | B09 | (±)-2-Amino-5-phosphonopentanoic acid   | (±)-AP-5; (±)-AP-V                                                                           | 09 | B09 | LY-310,762 hydrochloride                                     | (S)-1-(6-Bromo-2,3-dihydroindol-1-yl)-2-propylamine hemifumarate salt                                                                                         |
| 01 | B10 | Sodium Taurocholate hydrate             | 3α,7α,12α-Trihydroxy-5β-cholan-24-oic acid N-(2-sulfoethyl)amide                             | 09 | B10 | VER-3323 hemifumarate salt                                   | (1S,2S)-2-(2-(N-[(3-Benzimidazol-2-yl)propyl]-N-methylamino)ethyl)-6-fluoro-1,2,3,4-tetrahydro-1-isopropyl-2-naphthyl cyclopropanecarboxylate dihydrochloride |
| 01 | B11 | Methotrexate hydrate                    | Methylaminopterin; MTX                                                                       | 09 | B11 | NNC 55-0396                                                  | α-(4-Hydroxyphenyl)-β-(4-benzylpiperidin-1-yl)-β-methylethanol tartrate                                                                                       |
| 01 | C02 | S(-)-p-Bromotetramisole oxalate         | R 30402 oxalate                                                                              | 09 | C02 | Ifenprodil tartrate                                          |                                                                                                                                                               |
| 01 | C03 | TMB-8 hydrochloride                     | 8-(Diethylamino)octyl 3,4,5-trimethoxybenzoate hydrochloride                                 | 09 | C03 | 1-(5-Isoquinolylsulfonyl)-3-methylpiperazine dihydrochloride | Iso-H-7                                                                                                                                                       |
| 01 | C04 | L-azetidine-2-carboxylic acid           | (S)-Azetidine-2-carboxylic acid                                                              | 09 | C04 | L-N6-(1-Iminoethyl)lysine hydrochloride                      | L-NIL                                                                                                                                                         |
| 01 | C05 | S-(p-Azidophenacyl)glutathione          |                                                                                              | 09 | C05 | p-Iodoclonidine hydrochloride                                | 2-[(2,6-Dichloro-4-iodophenyl)imino]imidazoline hydrochloride                                                                                                 |
| 01 | C06 | Acetyl-beta-methylcholine chloride      | Methacholine chloride                                                                        | 09 | C06 | Molindone hydrochloride                                      | 3-Ethyl-1,5,6,7-tetrahydro-2-methyl-5-(4-morpholinylmethyl)-4H-indol-4-one hydrochloride                                                                      |
| 01 | C07 | AA-861                                  | 2-(12-Hydroxydodeca-5,10-diynyl)-3,5,6-trimethyl-p-benzoquinone                              | 09 | C07 | Ketoconazole                                                 | cis-1-Acetyl-4-[4-[[2-(2,4-dichlorophenyl)-2-(1H-imidazol-1-yl)methyl]-1,3-dioxolan-4-yl]methoxy]phenyl]-piperazine                                           |
| 01 | C08 | Azathioprine                            |                                                                                              | 09 | C08 | L-701,324                                                    | 7-Chloro-4-hydroxy-3-(3-phenoxy)phenylquinolin-2[1H]-one                                                                                                      |
| 01 | C09 | L-732,138                               | N-Acetyl-L-tryptophan 3,5-bis(trifluoromethyl)benzyl ester                                   | 09 | C09 | L-368,899 hydrochloride                                      | 1-((7,7-Dimethyl-2(S)-(2(S)-amino-4-(methylsulfonyl)butyramido)bicyclo[2,2,1]heptan-1(S)-yl)methylsulfonyl)-4-(2-methylphenyl)piperazine hydrochloride        |
| 01 | C10 | Amifostine                              | 2-(3-Aminopropyl)aminoethyl phosphorothioate; WR2721                                         | 09 | C10 | Lidocaine hydrochloride                                      |                                                                                                                                                               |
| 01 | C11 | Atropine methyl bromide                 |                                                                                              | 09 | C11 | Ro 90-7501                                                   | 2'-(4-Aminophenyl)-[2,5'-bi-1H-benzimidazol]-5-amine                                                                                                          |
| 01 | D02 | 5-Aminovaleric acid hydrochloride       | 5-Aminopentanoic acid hydrochloride                                                          | 09 | D02 | Isotharine mesylate                                          | 4-[1-Hydroxy-2-[(1-methylethyl)amino]butyl]-1,2-benzenediol mesylate                                                                                          |

|    |     |                                                  |                                                                                             |    |     |                                                                |                                                                                                                    |
|----|-----|--------------------------------------------------|---------------------------------------------------------------------------------------------|----|-----|----------------------------------------------------------------|--------------------------------------------------------------------------------------------------------------------|
| 01 | D03 | 4-Aminopyridine                                  |                                                                                             | 09 | D03 | (-)-Isoproterenol hydrochloride                                | (-)-Isoprenaline hydrochloride                                                                                     |
| 01 | D04 | p-Aminoclonidine hydrochloride                   | Apraclonidine hydrochloride                                                                 | 09 | D04 | 3-Iodo-L-tyrosine                                              | S(-)-3-Iodo-4-hydroxyphenylalanine                                                                                 |
| 01 | D05 | Aminopterin                                      | 4-Aminofolic acid                                                                           | 09 | D05 | R(+)-IAA-94                                                    | R(+)-Methylindazone; Indanyloxyacetic acid 94                                                                      |
| 01 | D06 | 5-azacytidine                                    | 4-Amino-1-(beta-D-ribofuranosyl)-1,3,5-triazin-2(1H)-one; Ladakamycin                       | 09 | D06 | IB-MECA                                                        | 1-Deoxy-1-[6-[[[(3-iodophenyl)methyl]amino]-9H-purin-9-yl]-N-methyl-beta-D-ribofuranuronamide                      |
| 01 | D07 | 9-Amino-1,2,3,4-tetrahydroacridine hydrochloride | Tacrine hydrochloride; THA hydrochloride                                                    | 09 | D07 | Ketorolac tris salt                                            | Toradol                                                                                                            |
| 01 | D08 | Acyclovir                                        | Acycloguanosine                                                                             | 09 | D08 | Ioxoprofen                                                     | Koloxo                                                                                                             |
| 01 | D09 | Acetylsalicylic acid                             | O-Acetylsalicylic acid; Aspirin                                                             | 09 | D09 | Lomefloxacin hydrochloride                                     |                                                                                                                    |
| 01 | D10 | Acetazolamide                                    | N-[5-(Aminosulfonyl)-1,3,4-thiadiazol-2-yl]acetamide                                        | 09 | D10 | Lidocaine N-ethyl bromide quaternary salt                      | QX-314                                                                                                             |
| 01 | D11 | Amperozide hydrochloride                         | 4-[4,4-bis(4-Fluorophenyl)butyl]-N-ethyl-1-piperazinecarboxamide hydrochloride              | 09 | D11 | Loratadine                                                     | 4-(8-chloro-5,6-dihydro-11H-benzo[5,6]cycloheptal[1,2-b]pyridin-11-ylidene-1-piperidinecarboxylic acid ethyl ester |
| 01 | E02 | (±)-Nipecotic acid                               | (±)-3-Piperidine carboxylic acid                                                            | 09 | E02 | Isoliquiritigenin                                              | 2',4,4'-Trihydroxychalcone                                                                                         |
| 01 | E03 | Atropine sulfate                                 |                                                                                             | 09 | E03 | 1-(5-Isoquinolinylsulfonyl)-2-methylpiperazine dihydrochloride | H-7 dihydrochloride                                                                                                |
| 01 | E04 | 3-aminobenzamide                                 | 3-ABA; 3-AB                                                                                 | 09 | E04 | Cibenzoline succinate                                          | 2-(2,2-diphenylcyclopropyl)-4,5-dihydro-1H-imidazole succinate                                                     |
| 01 | E05 | N-Acetyl-5-hydroxytryptamine                     | N-Acetylserotonin; Normelatonin                                                             | 09 | E05 | Indatraline hydrochloride                                      | Lu 19-005                                                                                                          |
| 01 | E06 | 5-(N-Ethyl-N-isopropyl)amiloride                 | EIPA                                                                                        | 09 | E06 | Aurothioglucose                                                | 1-Thio-D-glucopyranose gold salt                                                                                   |
| 01 | E07 | 10058-F4                                         | 5-[(4-Ethylphenyl)methylene]-2-thioxo-4-thiazolidinone                                      | 09 | E07 | Ketoprofen                                                     | 2-(3-Benzoylphenyl)propionic acid                                                                                  |
| 01 | E08 | Amiprilose hydrochloride                         | 1,2-O-Isopropylidene-3-O-[3'-(N,N-dimethylamino)propyl]-alpha-D-glucofuranose hydrochloride | 09 | E08 | Labetalol hydrochloride                                        | 2-Hydroxy-5-(1-hydroxy-2-[(1-methyl-3-phenylpropyl)amino]ethyl)benzamide hydrochloride                             |
| 01 | E09 | 5-(N-Methyl-N-isobutyl)amiloride                 | MIA                                                                                         | 09 | E09 | Lamotrigine                                                    | GI 267119X; 6-(2,3-dichlorophenyl)-1,2,4-triazine-3,5-diamine                                                      |
| 01 | E10 | Arecoline hydrobromide                           | 1-Methyl-1,2,5,6-tetrahydro-3-pyridinecarboxylic acid methyl ester hydrobromide             | 09 | E10 | L-Leucine thiol, oxidized dihydrochloride                      | Dithiobis(2-amino-4-methylpentane)                                                                                 |
| 01 | E11 | Aminoguanidine hemisulfate                       | Hydrazinecarboximidamide hemisulfate                                                        | 09 | E11 | (-)-Tetramisole hydrochloride                                  | Levamisole hydrochloride                                                                                           |
| 01 | F02 | Azelaic acid                                     | Dicarboxylic acid C9; Nonanedioic acid; AZA                                                 | 09 | F02 | (±)-Ibuprofen                                                  | alpha-Methyl-4-(isobutyl)phenylacetic acid                                                                         |
| 01 | F03 | Atropine methyl nitrate                          | AMN; Methylatropine nitrate                                                                 | 09 | F03 | Indomethacin                                                   |                                                                                                                    |
| 01 | F04 | (±)-Norepinephrine (+)bitartrate                 | (±)-Arterenol (+)bitartrate; (±)-Noradrenalin (+)bitartrate                                 | 09 | F04 | Ivermectin                                                     | MK-933                                                                                                             |
| 01 | F05 | Aurintricarboxylic acid                          | ATA                                                                                         | 09 | F05 | Iofetamine hydrochloride                                       | N-Isopropyl-p-iodoamphetamine hydrochloride                                                                        |

|    |     |                                                |                                                                          |    |     |                                                                         |                                                                                                                                                                                                                |
|----|-----|------------------------------------------------|--------------------------------------------------------------------------|----|-----|-------------------------------------------------------------------------|----------------------------------------------------------------------------------------------------------------------------------------------------------------------------------------------------------------|
| 01 | F06 | 3-Aminopropionitrile fumarate                  |                                                                          | 09 | F06 | 3-(1H-Imidazol-4-yl)propyl di(p-fluorophenyl)methyl ether hydrochloride |                                                                                                                                                                                                                |
| 01 | F07 | 1-Aminobenzotriazole                           | ABT; 1-Benzotriazolamine                                                 | 09 | F07 | K 185                                                                   | N-Butanoyl 2-(5,6,7-trihydro-11-methoxybenzo[c]cyclohept[2,1-a]indol-13-yl)ethanamine (5,7-dimethyl-2-ethyl-3-[[4-[2(n-butylloxycarbonylsulfonamido)-5-isobutyl-3-thienyl]phenyl]methyl]imidazo[4,5,6]pyridine |
| 01 | F08 | Sandoz 58-035                                  | 3-[Decyldimethylsilyl]-N-[2-(4-methylphenyl)-1-phenethyl]propanamide     | 09 | F08 | L-162,313                                                               | (-)-Lobeline hydrochloride                                                                                                                                                                                     |
| 01 | F09 | Acetylthiocholine chloride                     |                                                                          | 09 | F09 | alpha-Lobeline hydrochloride                                            | 7-Methyl-6,7,8,9,14,15-hexahydro-5H-benz[d]indolo[2,3-g]azecine                                                                                                                                                |
| 01 | F10 | A-315456                                       | N-[3-(cyclohexylidene(1H-imidazol-4-ylmethyl)phenyl]ethanesulfonamide    | 09 | F10 | LE 300                                                                  | Ethyl (S)-11,12,13,13a-Tetrahydro-7-methoxy-9-oxo-9H-imidazo[1,5-a]pyrrolo[2,1-c][1,4]benzodiazepine-1-carboxylate                                                                                             |
| 01 | F11 | Agmatine sulfate                               | (4-Aminobutyl)guanadine sulfate                                          | 09 | F11 | L-655,708                                                               | Indole-5-carboxamide                                                                                                                                                                                           |
| 01 | G02 | Tryptamine hydrochloride                       | 3-(2-Aminoethyl)indole hydrochloride                                     | 09 | G02 | SD-169                                                                  |                                                                                                                                                                                                                |
| 01 | G03 | Arcaïne sulfate                                | N,N'-1,4-Butanediylbis(guanidine) sulfate                                | 09 | G03 | Imipramine hydrochloride                                                |                                                                                                                                                                                                                |
| 01 | G04 | 4-Amino-1,8-naphthalimide                      |                                                                          | 09 | G04 | Imiloxan hydrochloride                                                  | RS 21361                                                                                                                                                                                                       |
| 01 | G05 | (±)-2-Amino-4-phosphonobutyric acid            | (±)-AP-4                                                                 | 09 | G05 | ICI 204,448 hydrochloride                                               |                                                                                                                                                                                                                |
| 01 | G06 | Apigenin                                       | 4',5,7-Trihydroxyflavone                                                 | 09 | G06 | Isonipetric acid                                                        | 4-Piperidine carboxylic acid                                                                                                                                                                                   |
| 01 | G07 | 3-Amino-1-propanesulfonic acid sodium          |                                                                          | 09 | G07 | Ketotifen fumarate                                                      |                                                                                                                                                                                                                |
| 01 | G08 | (±)-2-Amino-3-phosphonopropionic acid          | (±)-AP-3                                                                 | 09 | G08 | CyPPA                                                                   | Cyclohexyl-[2-(3,5-dimethyl-pyrazol-1-yl)-6-methyl-pyrimidin-4-yl]-amine                                                                                                                                       |
| 01 | G09 | 4-Androsten-4-ol-3,17-dione                    | 4-OH-A; 4-Hydroxy-4-androstene-3,17-dione                                | 09 | G09 | Loperamide hydrochloride                                                |                                                                                                                                                                                                                |
| 01 | G10 | GR 46611                                       | 3-[3-(2-Dimethylaminoethyl)-1H-indol-5-yl]-N-(4-methoxybenzyl)acrylamide | 09 | G10 | Lansoprazole                                                            |                                                                                                                                                                                                                |
| 01 | G11 | 4-Aminobenzamidine dihydrochloride             |                                                                          | 09 | G11 | LY-294,002 hydrochloride                                                | 2-(4-Morpholinyl)-8-phenyl-4H-1-benzopyran-4-one hydrochloride                                                                                                                                                 |
| 01 | H02 | 5-Fluoroindole-2-carboxylic acid 1-            |                                                                          | 09 | H02 | (±)-Isoproterenol hydrochloride                                         |                                                                                                                                                                                                                |
| 01 | H03 | Aminocyclopropanecarboxylic acid hydrochloride | ACPC                                                                     | 09 | H03 | Isoxanthopterin                                                         | 2-Amino-4,7-dihydroxypteridine                                                                                                                                                                                 |
| 01 | H04 | Reserpine                                      | Methyl reserpate; 3,4,5-Trimethoxybenzoic acid ester                     | 09 | H04 | Stevioside                                                              | (4a-13-[(2-O-β-D-Glucopyranosyl-β-D-glucopyranosyl)oxy]kaur-16-en-18-oic acid β-D-glucopyranosyl ester                                                                                                         |
| 01 | H05 | N-arachidonylglycine                           | NAGly                                                                    | 09 | H05 | ICI 118,551 hydrochloride                                               | (±)-1-[2,3-(Dihydro-7-methyl-1H-inden-4-yl)oxy]-                                                                                                                                                               |

|    |     |                                                               |                                                                               |    |     |                                |                                                                                              |
|----|-----|---------------------------------------------------------------|-------------------------------------------------------------------------------|----|-----|--------------------------------|----------------------------------------------------------------------------------------------|
| 01 | H06 | (+)-Butaclamol hydrochloride                                  |                                                                               | 09 | H06 | JWH-015                        | 3-[(1-methylethyl)amino]-2-butanol hydrochloride                                             |
| 01 | H07 | Apomorphine hydrochloride hemihydrate                         | 10,11-Dihydroxyaporphine hydrochloride hemihydrate                            | 09 | H07 | Kynurenic acid                 | (2-Methyl-1-propyl-1H-indol-3-yl)-1-naphthalenylmethanone                                    |
| 01 | H08 | L-Arginine                                                    |                                                                               | 09 | H08 | beta-Lapachone                 | 4-Hydroxyquinoline-2-carboxylic acid                                                         |
| 01 | H09 | 2-(2-Aminoethyl)isothiourea dihydrobromide                    | AET; S-(2-Aminoethyl)isothiuronium dihydrobromide                             | 09 | H09 | Lonidamine                     | Diclonazolic acid                                                                            |
| 01 | H10 | 2-Hydroxysaclofen                                             | (±)-3-Amino-2-(4-chlorophenyl)-2-hydroxy-propylsulfonic acid                  | 09 | H10 | L-687,384 hydrochloride        | 1'-Benzyl-3,4-dihydrospiro[naphthalene-1-(2H),4'-piperidine] hydrochloride                   |
| 01 | H11 | 3-Aminopropylphosphonic acid                                  |                                                                               | 09 | H11 | Loxapine succinate             |                                                                                              |
| 02 | A02 | N-Acetyl-L-Cysteine                                           |                                                                               | 10 | A02 | TMPH hydrochloride             | 2,2,6,6-Tetramethylpiperidin-4-yl heptanoate hydrochloride                                   |
| 02 | A03 | 6-Aminohexanoic acid                                          | 6-Aminocaproic acid; EACA                                                     | 10 | A03 | L-750,667 trihydrochloride     | (±)-3-[4-Iodophenyl]-1-piperazyl] methylpyrrolo [2,3-b] pyrimidine                           |
| 02 | A04 | Altretamine                                                   | N,N,N',N',N'',N'''-Hexamethyl-1,3,5-triazine-2,4,6-triamine                   | 10 | A04 | 4-Methylpyrazole hydrochloride | Fomepizole                                                                                   |
| 02 | A05 | Adenosine 3',5'-cyclic monophosphate                          | cAMP; 3',5'-Cyclic AMP                                                        | 10 | A05 | p-MPPI hydrochloride           | 4-Iodo-N-[2-4-(methoxyphenyl)-1-piperazinyl]ethyl]-N-2-pyridinyl-benzamide hydrochloride     |
| 02 | A06 | (±)-AMT hydrochloride                                         | (±)-2-Amino-5,6-dihydro-6-methyl-4H-1,3-thiazine hydrochloride                | 10 | A06 | Molsidomine                    | SIN-10                                                                                       |
| 02 | A07 | 5'-N-Methyl carboxamidoadenosine                              | MECA                                                                          | 10 | A07 | Metergoline                    | [(8beta)-1,6-Dimethylergolin-8-yl]-methyl]carbamic acid phenylmethyl ester                   |
| 02 | A08 | 1-Allyl-3,7-dimethyl-8-p-sulfophenylxanthine                  |                                                                               | 10 | A08 | Meclofenamic acid sodium       | 2-([2,6-Dichloro-3-methylphenyl]amino)benzoic acid sodium                                    |
| 02 | A09 | Acetohexamide                                                 |                                                                               | 10 | A09 | (±)-Metoprolol (+)-tartrate    | 1-(Isopropylamino)-3-(p-[beta-methoxyethyl]phenoxy)-2-propanol tartrate                      |
| 02 | A10 | cis-Azetidine-2,4-dicarboxylic acid                           |                                                                               | 10 | A10 | GW405833 hydrochloride         | 1-(2,3-Dichlorobenzoyl)-5-methoxy-2-methyl-(3-(morpholin-4-yl)ethyl)-1H-indole hydrochloride |
| 02 | A11 | 2,3-Butanedione monoxime                                      | Diacetyl monoxime                                                             | 10 | A11 | MDL 28170                      | Z-Val-Phe-CHO                                                                                |
| 02 | B02 | L-2-aminoadipic acid                                          | Aad; (S)-2-Aminohexanedioic acid; L-Homoglutamic acid                         | 10 | B02 | Lorglumide sodium              | CR 1409                                                                                      |
| 02 | B03 | ATPO                                                          | (R,S)-2-Amino-3-[5-tert-butyl-3-(phosphonomethoxy)-4-isoxazoly]propionic acid | 10 | B03 | Linopirdine                    | DuP 996                                                                                      |
| 02 | B04 | 2-(Methylthio)adenosine 5'-diphosphate trisodium salt hydrate | 2-Methylthio-ADP trisodium salt hydrate                                       | 10 | B04 | Nocodazole                     | R 17934                                                                                      |
| 02 | B05 | L(-)-Norepinephrine bitartrate                                | (-)-Arterenol bitartrate; Noradrenaline bitartrate                            | 10 | B05 | Metaproterenol hemisulfate     |                                                                                              |

|    |     |                                                    |                                                                                                       |    |     |                                                                        |                                                                                                                                                          |
|----|-----|----------------------------------------------------|-------------------------------------------------------------------------------------------------------|----|-----|------------------------------------------------------------------------|----------------------------------------------------------------------------------------------------------------------------------------------------------|
| 02 | B06 | Paroxetine hydrochloride hemihydrate (MW = 374.83) | (3S-trans)-3-[(1,3-benzodioxol-5-yloxy)methyl]-4-(4-fluorophenyl)piperidine hydrochloride hemihydrate | 10 | B06 | 3-Methyl-6-(3-[trifluoromethyl]phenyl)-1,2,4-triazolo[4,3-b]pyridazine | CL 218,872                                                                                                                                               |
| 02 | B07 | PNU-37883A                                         | N-(1-Adamantyl)-N'-cyclohexyl-4-morpholinecarboxamide hydrochloride                                   | 10 | B07 | (-)-cis-(1S,2R)-U-50488 tartrate                                       | (-)-(1S,2R)-cis-3,4-Dichloro-N-methyl-N-[2-(1-pyrrolidinyl)cyclohexyl]benzeneacetamide tartrate                                                          |
| 02 | B08 | trans-(±)-ACPD                                     | trans-(±)-1-Amino-1,3-cyclopentanedicarboxylic acid                                                   | 10 | B08 | Milrinone                                                              | 1,6-Dihydro-2-methyl-6-oxo-[3,4'-bipyridine]-5-carbonitrile                                                                                              |
| 02 | B09 | SKF-89145 hydrobromide                             | 4-(3,4-Dihydroxyphenyl)-6-methyl-4,5,6,7-tetrahydrothieno[2,3-c]pyridine hydrobromide                 | 10 | B09 | 6-Methyl-2-(phenylethynyl)pyridine hydrochloride                       | MPEP hydrochloride                                                                                                                                       |
| 02 | B10 | trans-Azetidine-2,4-dicarboxylic acid              | tADA                                                                                                  | 10 | B10 | 2-methoxyestradiol                                                     | 2-Hydroxyestradiol 2-methyl ether                                                                                                                        |
| 02 | B11 | SB 222200                                          |                                                                                                       | 10 | B11 | Myricetin                                                              | Cannabiscetin                                                                                                                                            |
| 02 | C02 | N-Acetyltryptamine                                 | 3-(2-N-Acetylaminoethyl)indole                                                                        | 10 | C02 | PM-20                                                                  | 1-[1,1'-biphenyl]-4-yl-3,4-bis[(2-hydroxyethyl)thio]-1H-Pyrrole-2,5-dione                                                                                |
| 02 | C03 | Allopurinol                                        | 1H-Pyrazolo[3,4-d]pyrimidin-4-ol                                                                      | 10 | C03 | L-741,626                                                              | (±)-3-[4-(4-Chlorophenyl)-4-hydroxypiperidinyl]methylin-dole                                                                                             |
| 02 | C04 | Aminoguanidine hydrochloride                       | Guanylh-drazine hydrochloride                                                                         | 10 | C04 | N-omega-Methyl-5-hydroxytryptamine oxalate salt                        | N-omega-Methylserotonin                                                                                                                                  |
| 02 | C05 | 5-(N,N-hexamethylene)amiloride                     |                                                                                                       | 10 | C05 | Mianserin hydrochloride                                                | 1,2,3,4,10,14b-Hexahydro-2-methyl-dibenzo[c,f]pyr-zino[1,2-a]azepine hydrochloride                                                                       |
| 02 | C06 | Antozoline hydrochloride                           | 2-(N-Benzylanilinomethyl)-2-imidazoline hydrochloride                                                 | 10 | C06 | Mizoribine                                                             | N'-(beta-D-Ribofuranosyl)-5-hydroxyimidazole-4-carboxamide                                                                                               |
| 02 | C07 | Tracazolate                                        | 4-(Butylamino)-1-ethyl-6-methyl-1H-pyrazolo [3,4-b]pyridine-5-carboxylic acid ethyl ester             | 10 | C07 | Clorgyline hydrochloride                                               | N-Methyl-N-propargyl-3-(2,4-dichlorophenoxy)-propylamine hydrochloride                                                                                   |
| 02 | C08 | Diacylglycerol kinase inhibitor I                  | R 59022                                                                                               | 10 | C08 | (±)-alpha-Methyl-4-carboxyphenylglycine                                | (±)-MCPG                                                                                                                                                 |
| 02 | C09 | cis-4-Aminocrotonic acid                           | CACA                                                                                                  | 10 | C09 | Mibefradil dihydrochloride                                             | Ro 40-5967; (1S,2S)-2-[2[[3-(2-benzimidazolylpropyl)methylamino]ethyl]-6-fluoro-1,2,3,4-tetrahydro-1-isopropyl-2-naphthyl methoxyacetate dihydrochloride |
| 02 | C10 | CBIQ                                               | 4-Chlorobenzo[f]isoquinolone                                                                          | 10 | C10 | Cysteamine hydrochloride                                               | Mercaptamine; MEA hydrochloride                                                                                                                          |
| 02 | C11 | 1-benzoyl-5-methoxy-2-methylindole-3-acetic acid   |                                                                                                       | 10 | C11 | NG-Monomethyl-L-arginine acetate                                       | L-NMMA                                                                                                                                                   |
| 02 | D02 | Amiloride hydrochloride                            |                                                                                                       | 10 | D02 | cis(+/-)-8-OH-PBZI hydrobromide                                        | cis-8-Hydroxy-3-(n-propyl)-1,2,3a,4,5,9b-hexahydro-1H-benz[e]indole hydrobromide (2S,3S) 3-([3,5-                                                        |
| 02 | D03 | Amitriptyline hydrochloride                        |                                                                                                       | 10 | D03 | L-733,060 hydrochloride                                                | Bis(trifluoromethyl)phenyl]methoxy)-2-phenylpiperidine hydrochloride                                                                                     |
| 02 | D04 | BW 284c51                                          | 1,5-Bis(4-allyldimethylammoniumphenyl)pentan-3-one dibromide                                          | 10 | D04 | Moxonidine hydrochloride                                               | BDF-5895                                                                                                                                                 |
| 02 | D05 | Fulvestrant                                        | (7a, 17b)-7-[9-[(4,4,5,5,5-pentafluoropentyl)Sulfinyl]n                                               | 10 | D05 | Mevastatin                                                             | Compactin                                                                                                                                                |

|    |     |                                                        |                                                                                                                                             |    |     |                                                                           |                                                                                            |
|----|-----|--------------------------------------------------------|---------------------------------------------------------------------------------------------------------------------------------------------|----|-----|---------------------------------------------------------------------------|--------------------------------------------------------------------------------------------|
|    |     |                                                        | onyl]estra-1,3,5-(10)-triene-3,17-diol                                                                                                      |    |     |                                                                           |                                                                                            |
| 02 | D06 | Aniracetam                                             |                                                                                                                                             | 10 | D06 | S-Methylisothiurea hemisulfate                                            | Carbamimidothioic acid methyl ester hemisulfate                                            |
| 02 | D07 | Amoxapine                                              |                                                                                                                                             | 10 | D07 | MRS 2179                                                                  | 2'-Deoxy-N6-methyl adenosine 3',5'-diphosphate diammonium salt                             |
| 02 | D08 | 1-Amino-1-cyclohexanecarboxylic acid hydrochloride     |                                                                                                                                             | 10 | D08 | 1-Methylhistamine dihydrochloride                                         |                                                                                            |
| 02 | D09 | Aminophenyl)ethyladenosine                             | APNEA                                                                                                                                       | 10 | D09 | N6-Methyladenosine                                                        | 6-Methylaminopurine-9-ribofuranoside                                                       |
| 02 | D10 | AIDA                                                   | 1-Aminoindan-1,5-dicarboxylic acid; UPF 523                                                                                                 | 10 | D10 | alpha,beta-Methylene adenosine 5'-triphosphate dilithium                  | alpha,beta-Methylene ATP, AMP-CPP dilithium                                                |
| 02 | D11 | p-Benzoquinone                                         | Quinone; p-BQ                                                                                                                               | 10 | D11 | MK-912                                                                    | L-657,743 hydrochloride                                                                    |
| 02 | E02 | (±)-Atenolol                                           |                                                                                                                                             | 10 | E02 | L-703,606 oxalate                                                         | cis-2-(Diphenylmethyl)-N-[(2-iodophenyl)methyl]-1-azabicyclo[2.2.2]octan-3-amine oxalate   |
| 02 | E03 | Amiodarone hydrochloride                               |                                                                                                                                             | 10 | E03 | Metoclopramide hydrochloride                                              |                                                                                            |
| 02 | E04 | Adenosine                                              |                                                                                                                                             | 10 | E04 | MRS 1845                                                                  | N-Propargylnitrendipene                                                                    |
| 02 | E05 | (±)-p-Aminoglutethimide                                |                                                                                                                                             | 10 | E05 | 8-Methoxymethyl-3-isobutyl-1-methylxanthine                               | 8-Methoxymethyl-IBMX                                                                       |
| 02 | E06 | MRS 2211 sodium salt hydrate                           | 2-[(2-Chloro-5-nitrophenyl)azo]-5-hydroxy-6-methyl-3-[(phosphonoxy)methyl]-4-pyridinecarboxaldehyde sodium salt hydrate sodium salt hydrate | 10 | E06 | MG 624                                                                    | N,N,N-Triethyl-2-(4-trans-stilbenoxy)ethylammonium iodide                                  |
| 02 | E07 | Aminobenzotropine                                      | ABT                                                                                                                                         | 10 | E07 | Meloxicam sodium                                                          | 4-Hydroxy-2-methyl-N-(5-methyl-2-thiazolyl)-2H-1,2-benzothiazine-3-carboxamide 1,1-dioxide |
| 02 | E08 | Alaproclate hydrochloride                              | D,L-Alanine, 2-(4-chlorophenyl)-1,1-dimethylethyl ester hydrochloride                                                                       | 10 | E08 | Moxisylyte hydrochloride                                                  | 4-Dimethylaminoethoxy-5-isopropyl-2-methylphenyl acetate hydrochloride                     |
| 02 | E09 | Opipramol dihydrochloride                              | 4-[3-(5H-Dibenz[b,f]azepin-5-yl)propyl]-1-piperazineethanol dihydrochloride                                                                 | 10 | E09 | (S)-MAP4 hydrochloride                                                    | (S)-2-Amino-2-methyl-4-phosphonobutanoate hydrochloride                                    |
| 02 | E10 | A-77636 hydrochloride                                  |                                                                                                                                             | 10 | E10 | Methoxamine hydrochloride (±)-3-(3,4-dihydroxyphenyl)-2-methyl-DL-alanine |                                                                                            |
| 02 | E11 | 8-Bromo-cGMP sodium                                    | 8-Bromoguanosine-3',5'-cyclophosphate sodium                                                                                                | 10 | E11 |                                                                           | DL-alpha-Methyl-DOPA                                                                       |
| 02 | F02 | Xli 093 hydrate                                        | Bis[8-ethynyl-5,6-dihydro-5-methyl-6-oxo-4H-imidazo[1,5-a][1,4]benzodiazepine-3-carboxylic acid] 1,3-propanediyl ester hydrate              | 10 | F02 | Levallorphan tartrate                                                     | 17-(2-Propenyl)morphinan-3-ol tartrate                                                     |
| 02 | F03 | 4-(2-Aminoethyl)benzenesulfonyl fluoride hydrochloride | AEBSF                                                                                                                                       | 10 | F03 | R(-)-Me5                                                                  | 1-(2,6-Dimethylphenoxy)-3-methyl-2-butanamine hydroiodide                                  |
| 02 | F04 | L-Aspartic acid                                        |                                                                                                                                             | 10 | F04 | BIO                                                                       | (2'Z,3'E)-6-Bromindirubin-3'-oxime                                                         |

|    |     |                                                |                                                                       |    |     |                                                     |                                                                                                                                       |
|----|-----|------------------------------------------------|-----------------------------------------------------------------------|----|-----|-----------------------------------------------------|---------------------------------------------------------------------------------------------------------------------------------------|
| 02 | F05 | (±)-HA-966                                     | (±)-3-Amino-1-hydroxy-2-pyrrolidone                                   | 10 | F05 | MK-886                                              | 3-[3-tert-Butylthio-1-(4-chlorobenzyl)-5-isopropyl-1H-indol-2-yl]-2,2-dimethylpropionic acid, sodium salt                             |
| 02 | F06 | 8-(p-Sulfophenyl)theophylline                  |                                                                       | 10 | F06 | N-Methyl-D-aspartic acid                            | NMDA                                                                                                                                  |
| 02 | F07 | Arecaidine propargyl ester hydrobromide        | APE                                                                   | 10 | F07 | Morin                                               | 2',3,4',5,7-Pentahydroxyflavone                                                                                                       |
| 02 | F08 | Psora-4                                        | 5-(4-Phenylbutoxy)psoralen                                            | 10 | F08 | S-Methyl-L-thiocitrulline acetate                   | N5-[Imino(methylthio)methyl]-L-ornithine acetate                                                                                      |
| 02 | F09 | gamma-Acetylinic GABA                          | 4-Amino-5-hexynoic acid                                               | 10 | F09 | (±)-Methoxyverapamil hydrochloride                  | D600; Gallopamil                                                                                                                      |
| 02 | F10 | ATPA                                           | (RS)-2-Amino-3-(3-hydroxy-5-tert-butylisoxazol-4-yl)propanoic acid    | 10 | F10 | Mitoxantrone                                        | 1,4-Dihydroxy-5,8-bis-([2-([2-hydroxyethyl]amino)ethyl]amino)-9,10-anthracenedione                                                    |
| 02 | F11 | TBBz                                           | 4,5,6,7-Tetrabromobenzimidazole                                       | 10 | F11 | MRS 2159                                            |                                                                                                                                       |
| 02 | G02 | L-allylglycine                                 | L-2-Amino-4-pentenoic acid                                            | 10 | G02 | AFMK                                                | N-[3-[2-(Formylamino)-5-methoxyphenyl]-3-oxopropyl]acetamide; NSC 688263                                                              |
| 02 | G03 | Ancitabine hydrochloride                       | Cyclocytidine hydrochloride; Cyclo-C                                  | 10 | G03 | Dihydrocapsaicin                                    | 8-Methyl-N-vanillylnonanamide                                                                                                         |
| 02 | G04 | Astaxanthin                                    | 3,3'-Dihydroxy-beta,beta-carotene-4,4'-dione                          | 10 | G04 | MRS 1523                                            | 3-propyl-6-ethyl-5-[(ethylthio)carbonyl]-2-phenyl-4-propyl-3-pyridine carboxylate                                                     |
| 02 | G05 | Lercanidipine hydrochloride hemihydrate        |                                                                       | 10 | G05 | Mexiletene hydrochloride                            | 1-(2,6-Xylyloxy)-2-aminopropane                                                                                                       |
| 02 | G06 | 1,3-Dipropyl-8-p-sulfophenylxanthine           |                                                                       | 10 | G06 | alpha-Methyl-DL-tyrosine methyl ester hydrochloride | AMPT                                                                                                                                  |
| 02 | G07 | Indirubin-3'-oxime                             |                                                                       | 10 | G07 | Minoxidil                                           |                                                                                                                                       |
| 02 | G08 | SB 200646 hydrochloride                        | N-(1-Methyl-1H-indol-5-yl)-N'-3-pyridinyl-urea hydrochloride          | 10 | G08 | Melatonin                                           | N-[2-(5-Methoxyindol-3-yl)ethyl]acetamide                                                                                             |
| 02 | G09 | AB-MECA                                        | N6-(4-Aminobenzyl)-9-[5-(methylcarbonyl)-beta-D-ribofuranosyl]adenine | 10 | G09 | Metrazoline oxalate                                 | 1H-Imidazole, 4,5-dihydro-2-[(1E)-2-(2-methylphenyl)ethenyl-, ethandioate                                                             |
| 02 | G10 | ARL 67156 trisodium salt                       | FPL 67156                                                             | 10 | G10 | O-Methylserotonin hydrochloride                     | Mexamine hydrochloride                                                                                                                |
| 02 | G11 | Bromoenol lactone                              | BEL; E-6-(Bromoethylene)tetrahydro-3-(1-naphthyl)-2H-pyran-2-one      | 10 | G11 | GR 127935 hydrochloride hydrate                     | N-[4-Methoxy-3-(4-methyl-1-piperazinyl)phenyl]-2'-methyl-4'-(5-methyl-1,2,4-oxadiazol-3-yl)-1,1'-biphenyl-4-carboxamide hydrochloride |
| 02 | H02 | ABT-418 hydrochloride                          | 3-Methyl-5-[(2S)-1-methyl-2-pyrrolidinyl]isoxazole hydrochloride      | 10 | H02 | L-745,870 hydrochloride                             | 3-[[4-(4-Chlorophenyl)piperazin-1-yl]methyl]-1H-pyrrolo[2,3-b]pyridine hydrochloride                                                  |
| 02 | H03 | Alprenolol hydrochloride                       |                                                                       | 10 | H03 | (-)-Naproxen sodium                                 | (S)-6-Methoxy-alpha-methyl-2-naphthaleneacetic acid sodium                                                                            |
| 02 | H04 | N-(4-Amino-2-chlorophenyl)phthalimide          |                                                                       | 10 | H04 | Melphalan                                           | L-Phenylalanine mustard                                                                                                               |
| 02 | H05 | Amsacrine hydrochloride                        | m-AMSA hydrochloride                                                  | 10 | H05 | Methylergonovine maleate                            | Methergine maleate                                                                                                                    |
| 02 | H06 | 2-Methylthioadenosine triphosphate tetrasodium | 2-Methylthio ATP tetrasodium                                          | 10 | H06 | ML 10302                                            | 2-Piperidinoethyl-4-amino-5-chloro-2-methoxybenzoate                                                                                  |



|    |     |                                                  |                                                                                |    |     |                                                                   |                                                                                                              |
|----|-----|--------------------------------------------------|--------------------------------------------------------------------------------|----|-----|-------------------------------------------------------------------|--------------------------------------------------------------------------------------------------------------|
| 02 | H07 | S(-)-Atenolol                                    |                                                                                | 10 | H07 | Rufinamide                                                        | 1-[(2,6-difluorophenyl)methyl]-1H-1,2,3-Triazole-4-carboxamide                                               |
| 02 | H08 | D(-)-2-Amino-7-phosphonoheptanoic acid           | D-AP-7                                                                         | 10 | H08 | L-Methionine sulfoximine                                          | L-S-(3-Amino-3-carboxypropyl)-S-methylsulfoximine                                                            |
| 02 | H09 | Alloxazine                                       | Isoalloxazine                                                                  | 10 | H09 | GW9662                                                            | 2-Chloro-5-nitro-N-phenylbenzamide                                                                           |
| 02 | H10 | Beclomethasone                                   | 9alpha-Chloro-16beta-methyl-1,4-pregnadiene-11beta,17alpha,21-triol-3,20-dione | 10 | H10 | Se-(methyl)selenocysteine hydrochloride                           | Se-MSK                                                                                                       |
| 02 | H11 | Benzamide                                        | Benzoylamide                                                                   | 10 | H11 | 2,6-Difluoro-4-[2-(phenylsulfonylamino)ethylthio]phenoxyacetamide | PEPA                                                                                                         |
| 03 | A02 | 3-Bromo-7-nitroindazole                          |                                                                                | 11 | A02 | Mifepristone                                                      | RU-486                                                                                                       |
| 03 | A03 | Bumetanide                                       | 3-(Aminosulfonyl)-5-(butylamino)-4-phenoxybenzoic acid                         | 11 | A03 | Minocycline hydrochloride                                         |                                                                                                              |
| 03 | A04 | (±)-Baclofen                                     | Lioresal                                                                       | 11 | A04 | (-)-MK-801 hydrogen maleate                                       | (5S,10R)-(-)-5-Methyl-10,11-dihydro-5H-dibenzo[a,d]cyclohepten-5,10-imine                                    |
| 03 | A05 | Brefeldin A from <i>Penicillium brefeldianum</i> | BFA; Ascotoxin, Cyanein                                                        | 11 | A05 | Methiothepin mesylate                                             | 1-[10,11-Dihydro--8-(methylthio)dibenzo[b,f]thiepin-10-yl]-4-methylpiperazine mesylate                       |
| 03 | A06 | BP 897                                           | N-[4-(4-(2-methoxyphenyl)piperazinyl)butyl]-2-naphthamide                      | 11 | A06 | MDL 105,519                                                       | (Z)-2-Carboxy-4,6-dichloroindole-3-(2'-phenyl-2'-carboxy)-ene                                                |
| 03 | A07 | Bupropion hydrochloride                          | (±)-1-(3-Chlorophenyl)-2-[(1,1-dimethylethyl)amino]-1-propanone hydrochloride  | 11 | A07 | nor-Binaltorphimine dihydrochloride                               | nor-BNI dihydrochloride                                                                                      |
| 03 | A08 | BU224 hydrochloride                              | 2-(4,5-Dihydroimidazol-2-yl)-quinoline hydrochloride                           | 11 | A08 | NCS-356                                                           | 4-(4-chlorophenyl)-4-hydroxy-2-butanolic acid                                                                |
| 03 | A09 | Ciprofibrate                                     | 2-[p-(2,2-Dichlorocyclopropyl)phenoxy]-2-methylpropanoic acid                  | 11 | A09 | (-)-Nicotine hydrogen tartrate salt                               | (-)-1-Methyl-2-(3-pyridyl)pyrrolidine                                                                        |
| 03 | A10 | CGP-7930                                         | 3-(3',5'-Di-tert-butyl-4'-hydroxy)phenyl-2,2-dimethylpropanol                  | 11 | A10 | Nicardipine hydrochloride                                         | YC-93 hydrochloride                                                                                          |
| 03 | A11 | Chlorprothixene hydrochloride                    | 2-Chloro-9-(3-dimethylaminopropylidene)thioxanthene hydrochloride              | 11 | A11 | NF 023                                                            | 8,8'-[carbonylbis(imino-3,1-phenylene carbonylimino)]bis(1,3,5-naphthalene-trisulfonic acid) hexasodium salt |
| 03 | B02 | (+)-Bromocriptine methanesulfonate               |                                                                                | 11 | B02 | L-alpha-Methyl-p-tyrosine                                         | (S)-alpha-Methyltyrosine                                                                                     |
| 03 | B03 | Betaine hydrochloride                            |                                                                                | 11 | B03 | Maprotiline hydrochloride                                         | 9-(gamma-Methylaminopropyl)-9,10-dihydro-9,10-ethanoanthracene hydrochloride                                 |
| 03 | B04 | SB 202190                                        | 4-[4-(4-Fluorophenyl)-5-(4-pyridinyl)-1H-imidazol-2-yl]phenol                  | 11 | B04 | 2-Methyl-5-hydroxytryptamine maleate                              | 2-Methylserotonin maleate                                                                                    |
| 03 | B05 | Budesonide                                       | 16,17-Butylidenebis(oxy)-11,21-dihydroxypregna-1,4-diene-3,20-dione            | 11 | B05 | PRL-3 Inhibitor I                                                 | 5-[[5-bromo-2-[(2-bromophenyl)methoxy]phenyl]methylene]-2-thioxo-4-thiazolidinone                            |
| 03 | B06 | (E)-5-(2-Bromovinyl)-2'-deoxyuridine             | BVdU                                                                           | 11 | B06 | Metrifudil                                                        | N-[(2-Methylphenyl)methyl]-adenosine                                                                         |

|    |     |                                            |                                                                                                         |    |     |                                          |                                                                                                 |
|----|-----|--------------------------------------------|---------------------------------------------------------------------------------------------------------|----|-----|------------------------------------------|-------------------------------------------------------------------------------------------------|
| 03 | B07 | (-)-Bicuculline methbromide,<br>1(S), 9(R) |                                                                                                         | 11 | B07 | Neostigmine bromide                      |                                                                                                 |
| 03 | B08 | B-HT 933 dihydrochloride                   | Azepexole dihydrochloride                                                                               | 11 | B08 | S-Nitrosoglutathione                     | GSNO                                                                                            |
| 03 | B09 | 6-Chloromelatonin                          | N-Acetyl-6-chloro-5-methoxytryptamine                                                                   | 11 | B09 | NG-Nitro-L-arginine                      | L-NOARG; L-NNA                                                                                  |
| 03 | B10 | CGP-13501                                  | 3-(3',5'-Di-tert-butyl-4'-hydroxy)phenyl-2,2-dimethylpropanal                                           | 11 | B10 | Nifedipine                               |                                                                                                 |
| 03 | B11 | Choline bromide                            | Choline-methyl-13C bromide                                                                              | 11 | B11 | Nimustine hydrochloride                  | ACNU                                                                                            |
| 03 | C02 | O6-benzylguanine                           |                                                                                                         | 11 | C02 | SB-215505                                | 6-Chloro-5-methyl-1-5-quinolylcarbamoyl-indoline                                                |
| 03 | C03 | Betaine aldehyde chloride                  | (Formylmethyl)trimethylammonium chloride                                                                | 11 | C03 | H-8 dihydrochloride                      | N-[2-(Methylamino)ethyl]-5-isoquinolinesulfonamide dihydrochloride                              |
| 03 | C04 | Bay 11-7085                                | (E)-3-(4-t-Butylphenylsulfonyl)-2-propenenitrile                                                        | 11 | C04 | alpha-Methyl-5-hydroxytryptamine maleate | alpha-Methylserotonin maleate                                                                   |
| 03 | C05 | 8-Bromo-cAMP sodium                        | 8-Bromoadenosine-3',5'-cyclophosphate sodium                                                            | 11 | C05 | Mesulergine hydrochloride                | CU 32-085 hydrochloride                                                                         |
| 03 | C06 | BRL 15572                                  | 4-(3-Chlorophenyl)-alpha-(diphenylmethyl)-1-piperazineethanol hydrochloride                             | 11 | C06 | p-MPPF dihydrochloride                   | 4-Fluoro-N-(2-[4-(2-methoxyphenyl)1-piperazinyl]ethyl)-N-(2-pyridinyl)benzamide dihydrochloride |
| 03 | C07 | (±)-Bay K 8644                             | 1,4-Dihydro-2,6-dimethyl-5-nitro-4-[2-(trifluoromethyl)-phenyl]-3-pyridine carboxylic acid methyl ester | 11 | C07 | CR 2249                                  | Nebostinel                                                                                      |
| 03 | C08 | (±)-Butaclamol hydrochloride               | AY 23028                                                                                                | 11 | C08 | NCS-382                                  | 1-Ethyl-1,4-dihydro-7-methyl-4-oxo-1,8-naphthyridine-3-carboxylic acid                          |
| 03 | C09 | Carmustine                                 | BCNU; 1,3-Bis(2-chloroethyl)-1-nitrosourea                                                              | 11 | C09 | Naphazoline hydrochloride                | 2-(1-Naphthylmethyl)imidazoline nitrate                                                         |
| 03 | C10 | CP55940                                    | 5-(1,1-dimethylheptyl)-2-[5-hydroxy-2-(3-hydroxypropyl)cyclohexyl]phenol                                | 11 | C10 | Naloxone hydrochloride                   |                                                                                                 |
| 03 | C11 | BTO-1                                      | 5-Cyano-7-nitro-2-benzothiazolocarboxamide-3-oxide                                                      | 11 | C11 | Norcantharidin                           |                                                                                                 |
| 03 | D02 | N-Bromoacetamide                           | NBA                                                                                                     | 11 | D02 | 1-Methylimidazole                        | Methimazole                                                                                     |
| 03 | D03 | Benazoline oxalate                         | 4,5-Dihydro-2-(2-naphthalenyl)-1H-imidazole oxalate                                                     | 11 | D03 | Proglumide                               | 4-Benzoylamino-5-dipropylamino-5-oxopentanoic acid                                              |
| 03 | D04 | Betaxolol hydrochloride                    |                                                                                                         | 11 | D04 | Metolazone                               |                                                                                                 |
| 03 | D05 | Benztropine mesylate                       |                                                                                                         | 11 | D05 | MDL 26,630 trihydrochloride              | 1,5-(Diethylamino)piperidine trihydrochloride                                                   |
| 03 | D06 | Chloroethylclonidine dihydrochloride       | CEC dihydrochloride                                                                                     | 11 | D06 | Levetiracetam                            | (alphaS)-alpha-Ethyl-2-oxo-1-pyrrolidineacetamide                                               |
| 03 | D07 | Bromoacetylcholine bromide                 | 2-(2-Bromoacetyloxy)-N,N,N-trimethylethanaminium bromide                                                | 11 | D07 | S-(4-Nitrobenzyl)-6-thioinosine          | NBTI                                                                                            |
| 03 | D08 | BRL 37344 sodium                           | (±)-(R*,R*)-[4-[2-[2-(3-Chlorophenyl)-2-hydroxyethyl]amino]propyl]phenoxy]-acetic acid sodium           | 11 | D08 | Nalidixic acid sodium                    | 1-Ethyl-1,4-dihydro-7-methyl-4-oxo-1,8-naphthyridine-3-carboxylic acid sodium                   |
| 03 | D09 | PK 11195                                   | 1-(2-Chlorophenyl)-N-methyl-N-(1-methylpropyl)                                                          | 11 | D09 | 3-Nitropropionic acid                    |                                                                                                 |

|    |     |                                               |                                                                                                                                                        |    |     |                                                |                                                                                    |
|----|-----|-----------------------------------------------|--------------------------------------------------------------------------------------------------------------------------------------------------------|----|-----|------------------------------------------------|------------------------------------------------------------------------------------|
| 03 | D10 | L-Cycloserine                                 | (S)-4-Amino-3-isoxazolidone                                                                                                                            | 11 | D10 | 7-Nitroindazole                                |                                                                                    |
| 03 | D11 | CB 1954                                       | 5-(1-Aziridinyl)-2,4-dinitrobenzamide                                                                                                                  | 11 | D11 | Noscapine hydrochloride                        | Narcotine                                                                          |
| 03 | E02 | (±)-Brompheniramine maleate                   |                                                                                                                                                        | 11 | E02 | Mecamylamine hydrochloride                     |                                                                                    |
| 03 | E03 | BWB70C                                        | N-[3-[3-(4-Fluorophenoxy)phenyl]-1-methyl-2-propenyl]-N-hydroxyurea                                                                                    | 11 | E03 | Fenobam                                        | N-(3-Chlorophenyl)-N'-(4,5-dihydro-1-methyl-4-oxo-1H-imidazole-2-yl)urea           |
| 03 | E04 | Benzamidine hydrochloride                     | Amidinobenzene hydrochloride                                                                                                                           | 11 | E04 | DFB                                            | 3,3'-Difluorobenzaldazine                                                          |
| 03 | E05 | Ro 20-1724                                    | 4-[(3-Butoxy-4-methoxyphenyl)methyl]-2-imidazolidione                                                                                                  | 11 | E05 | ZM 39923 hydrochloride                         | 3-(N-Benzyl-N-isopropyl)amino-1-(naphthalen-2-yl)propan-1-one hydrochloride        |
| 03 | E06 | 6-Fluoronorepinephrine hydrochloride          | 6-FNE hydrochloride                                                                                                                                    | 11 | E06 | Niflumic acid                                  | 2-(3-[Trifluoromethyl]anilino)nicotinic acid                                       |
| 03 | E07 | BMV 7378 dihydrochloride                      | 8-[2-[4-(2-Methoxyphenyl)-1-piperazinyl]ethyl]-azaspiro[4.5]decane-7,9-dione dihydrochloride                                                           | 11 | E07 | Naltrexone hydrochloride                       | 17-(Cyclopropylmethyl)-4,5-epoxy-3,14-dihydroxymorphinan-6-one hydrochloride       |
| 03 | E08 | BRL 54443 maleate                             | 3-(1-Methylpiperidin-4-yl)-1H-indol-5-ol maleate                                                                                                       | 11 | E08 | Gossypol                                       | 2,2'-bis(8-Formyl-1,6,7-trihydroxy-5-isopropyl-3-methylnaphthalene)                |
| 03 | E09 | Caffeic Acid                                  | 3,4-Dihydroxycinnamic acid                                                                                                                             | 11 | E09 | NG-Nitro-L-arginine methyl ester hydrochloride | L-NAME hydrochloride                                                               |
| 03 | E10 | ML-9                                          |                                                                                                                                                        | 11 | E10 | NS 521 oxalate                                 | 1-(1-Butyl)-4-(2-oxo-1-benzimidazolyl)piperidine oxalate                           |
| 03 | E11 | S-(+)-PD 123177 trifluoroacetate salt hydrate | (S)-1-[(4-Amino-3-methylphenyl)methyl]-5-(diphenylacetyl)-4,5,6,7-tetrahydro-1H-Imidazo[4,5-c]pyridine-6-carboxylic acid trifluoroacetate salt hydrate | 11 | E11 | (+)-Nicotine (+)-di-p-toluoyl tartrate         | R(+)-3-(1-Methyl-2-pyrrolidinyl)pyridinium (+)-di-p-toluoyl tartrate               |
| 03 | F02 | Benzamil hydrochloride                        | N-(Benzylamidino)-3,5-diamino-6-chloropyrazinecarboxamide hydrochloride                                                                                | 11 | F02 | Methapyrilene hydrochloride                    | N,N-Dimethyl-N'-(2-pyridinyl)-N'-(2-thienylmethyl)-1,2-ethanediamine hydrochloride |
| 03 | F03 | 5-Bromo-2'-deoxyuridine                       | Br-dU; 5-Bromo-1-(2-deoxy-beta-D-ribofuranosyl)uracil                                                                                                  | 11 | F03 | (±)-Muscarine chloride                         | Tetrahydro-4-hydroxy-N,N,N,5-tetramethyl-2-furanmethan ammonium chloride           |
| 03 | F04 | Betamethasone                                 | 9alpha-Fluoro-16beta-methylprednisolone                                                                                                                | 11 | F04 | L-alpha-Methyl DOPA                            | MK-351; Methyl dopa                                                                |
| 03 | F05 | Bestatin hydrochloride                        | N-[(2S,3R)-3-Amino-2-hydroxy-4-phenylbutyryl]-L-leucine hydrochloride                                                                                  | 11 | F05 | Morpholinodnonimine hydrochloride              | Linsidomine hydrochloride                                                          |
| 03 | F06 | Bromoacetyl alprenolol menthane               |                                                                                                                                                        | 11 | F06 | Nimesulide                                     | N-(4-Nitro-2-phenoxyphenyl)methanesulfonamide                                      |
| 03 | F07 | R(+)-6-Bromo-APB hydrobromide                 | R(+)-6-Bromo-7,8-dihydroxy-3-allyl-1-phenyl-2,3,4,5-tetrahydro-1H-3-benzazepine hydrobromide                                                           | 11 | F07 | S-Nitroso-N-acetylpenicillamine                | SNAP                                                                               |
| 03 | F08 | Biperiden hydrochloride                       | 1-(5-Bicyclo[2.2.1]hept-2-enyl)-1-phenyl-3-(1-piperidinyl)propan-1-ol hydrochloride                                                                    | 11 | F08 | 5-Nitro-2-(3-phenylpropylamino)benzoic acid    | NPPB                                                                               |

|    |     |                                 |                                                                                      |    |     |                                                                  |                                                                                            |
|----|-----|---------------------------------|--------------------------------------------------------------------------------------|----|-----|------------------------------------------------------------------|--------------------------------------------------------------------------------------------|
| 03 | F09 | Cilostazol                      | OPC 13013; OPC 21; Pletaal                                                           | 11 | F09 | (±)-Normetanephrine hydrochloride                                | alpha-(Aminomethyl)-4-hydroxy-3-methoxy-benzyl alcohol hydrochloride                       |
| 03 | F10 | (+)-Catechin Hydrate            | (+)-Cyanidol-3                                                                       | 11 | F10 | CI-976                                                           | 2,2-Dimethyl-N-(2,4,6-trimethoxyphenyl)dodecanamide                                        |
| 03 | F11 | Corticosterone                  | Kendall's Compound B; 4-Pregnene-11beta,21-diol-3,20-dione; Reichstein's Substance H | 11 | F11 | Naltrindole hydrochloride                                        | NTI hydrochloride                                                                          |
| 03 | G02 | L-Buthionine-sulfoximine        |                                                                                      | 11 | G02 | Memantine hydrochloride                                          | 3,5-Dimethyl-1-adamantanamine hydrochloride                                                |
| 03 | G03 | Bepridil hydrochloride          |                                                                                      | 11 | G03 | Methoctramine tetrahydrochloride                                 | N,N'-bis[6-[(2-Methoxyphenyl)methyl]amino]hexyl]1,8-octane diamine tetrahydrochloride      |
| 03 | G04 | Buspirone hydrochloride         |                                                                                      | 11 | G04 | Methysergide maleate                                             |                                                                                            |
| 03 | G05 | Bretylum tosylate               | 2-Bromo-N-ethyl-N,N-dimethylbenzenemethanaminium 4-methylbenzenesulfonate            | 11 | G05 | 3-Methoxy-morphanin hydrochloride                                | nor-Dextromethorphan hydrochloride                                                         |
| 03 | G06 | Benoxathian hydrochloride       | 2-[[[2-(2,6-Dimethoxyphenoxy)ethyl]-amino]-methyl]-1,4-benzoxanthian hydrochloride   | 11 | G06 | Nialamide                                                        | 4-Pyridinecarboxylic acid 2-[3-oxo-3-[(phenylmethyl)amino]propyl]hydrazide                 |
| 03 | G07 | BTCP hydrochloride              |                                                                                      | 11 | G07 | Niclosamide                                                      | 2',5'-Dichloro-4'-nitrosalicylanilide                                                      |
| 03 | G08 | Chlorambucil                    | 4-[Bis(2-chloroethyl)amino]benzenbutyric acid                                        | 11 | G08 | AMN082                                                           | N,N'-Dibenzhydrylethane-1,2-diamine dihydrochloride                                        |
| 03 | G09 | Caffeine                        | 1,3,7-Trimethylxanthine                                                              | 11 | G09 | Nortriptyline hydrochloride                                      |                                                                                            |
| 03 | G10 | Chlorpropamide                  |                                                                                      | 11 | G10 | 6-Nitroso-1,2-benzopyrone                                        |                                                                                            |
| 03 | G11 | Carboplatin                     | cis-Diammine(1,1-cyclobutanedicarboxylato)platinum                                   | 11 | G11 | Sertraline hydrochloride                                         | (1S,4S)-4-(3,4-Dichlorophenyl)-1,2,3,4-tetrahydro-N-methyl-1-naphthalenamine hydrochloride |
| 03 | H02 | DL-Buthionine-[S,R]-sulfoximine |                                                                                      | 11 | H02 | Me-3,4-dephostatin                                               | 3,4-Dihydroxy-N-methyl-N-nitrosaline                                                       |
| 03 | H03 | (+)-Brompheniramine maleate     | Dexbrompheniramine maleate                                                           | 11 | H03 | (+)-MK-801 hydrogen maleate                                      | Dizocilpine maleate                                                                        |
| 03 | H04 | Benserazide hydrochloride       | DL-Serine, 2-[(2,3,4-trihydroxyphenyl)methyl]hydrazide hydrochloride                 | 11 | H04 | Ethopropazine hydrochloride                                      | 10-[2-(Diethylamino)propyl]phenothiazine hydrochloride                                     |
| 03 | H05 | BRL 50481                       | 5-Nitro-2,N,N-trimethylbenzenesulfonamide                                            | 11 | H05 | S15535                                                           | 1-(2,3-Dihydro-1,4-benzodioxin-5-yl)-4-(2,3-dihydro-1h-inden-2-yl)-piperazine              |
| 03 | H06 | Phenoxybenzamine hydrochloride  |                                                                                      | 11 | H06 | Nomifensine maleate                                              | 1,2,3,4-Tetrahydro-2-methyl-4-phenyl-8-isoquinolinamine maleate                            |
| 03 | H07 | DAPH                            | 4,5-Dianilinophthalimide; CGP 52411                                                  | 11 | H07 | NAN-190 hydrobromide                                             | 1-(2-Methoxyphenyl)-4-[4-(2-phthalimido)butyl]piperazine hydrobromide                      |
| 03 | H08 | Supercinnamaldehyde             | 1,3-Dihydro-1-methyl-3-(2-oxopropylidene)-2H-indole-2-one                            | 11 | H08 | Nordihydroguaiaretic acid from Larrea divaricata (creosote bush) | NDGA                                                                                       |
| 03 | H09 | Cyclophosphamide monohydrate    | 2-[Bis(2-chloroethyl)amino]tetrahydr                                                 | 11 | H09 | NADPH tetrasodium                                                | Reduced nicotinamide adenosine dinucleotide phosphate tetrasodium                          |

|    |     |                                                           |                                                                                            |    |     |                               |                                                                                                                       |
|----|-----|-----------------------------------------------------------|--------------------------------------------------------------------------------------------|----|-----|-------------------------------|-----------------------------------------------------------------------------------------------------------------------|
|    |     |                                                           | o-2H-1,3,2-oxazaphosphorine 2-oxide                                                        |    |     |                               |                                                                                                                       |
| 03 | H10 | 1-(4-Chlorobenzyl)-5-methoxy-2-methylindole-3-acetic acid |                                                                                            | 11 | H10 | Nilutamide                    | Anandron                                                                                                              |
| 03 | H11 | Cortisone                                                 | Kendall's Compound E; 4-Pregnene-17alpha,21-diol-3,11,20-trione; Reichstein's Substance Fa | 11 | H11 | NO-711 hydrochloride          | 1-(2-(((Diphenylmethylene)imino)oxy)ethyl)-1,2,5,6-tetrahydro-3-pyridine-carboxylic acid hydrochloride                |
| 04 | A02 | Chelerythrine chloride                                    | 1,2-Dimethoxy-N-methyl(1,3)benzodioxolo(5,6-c)phenanthridinium chloride                    | 12 | A02 | Nitrendipine                  | 1,4-Dihydro-2,6-dimethyl-4-(3-nitrophenyl)-3,5-pyridinecarboxylic acid ethyl methyl ester                             |
| 04 | A03 | Cyclosporin A                                             | Antibiotic S 7481F1                                                                        | 12 | A03 | Naloxone benzoylhydrazone     | [(5alpha)-4,5-Epoxy-3,14-dihydroxy-17-(2-propenyl)morphinan-6-ylidene]hydrazide benzoic acid                          |
| 04 | A04 | Carbachol                                                 | Carbamylcholine chloride                                                                   | 12 | A04 | Olomoucine                    | 2-[[9-Methyl-6-[(phenylmethyl)amino]-9H-purin-2-yl]amino]-ethanol                                                     |
| 04 | A05 | Cephalexin hydrate                                        |                                                                                            | 12 | A05 | Orphenadrine hydrochloride    | beta-Dimethylaminoethyl 2-methylbenzhydryl ether hydrochloride                                                        |
| 04 | A06 | Roscovitine                                               | (R)-2-(1-Ethyl-2-hydroxyethylamino)-6-benzylamino-9-isopropylpurine                        | 12 | A06 | (±)-OctoclothePIN maleate     | 1-(8-Chloro-10,11-dihydrobenzo[b,f]thiepin-10-yl)-4-methyl-piperazine maleate                                         |
| 04 | A07 | Cyproheptadine hydrochloride                              |                                                                                            | 12 | A07 | O-Phospho-L-serine            | L-Phosphoserine                                                                                                       |
| 04 | A08 | CB34                                                      | N,N-Dipropyl-2-(4-chlorophenyl)-6,8-dichloroimidazo[1,2-a]pyridine-3-acetamide             | 12 | A08 | Pancuronium bromide           | 1,1'-([2beta,3alpha,5alpha,16beta,17beta]-3,17-Bis[acetyloxy]androstane-2,16-diyl)bis(1-methylpiperidinium) dibromide |
| 04 | A09 | Cantharidin                                               | Cantharidine                                                                               | 12 | A09 | Pentolinium di[L(+)-tartrate] | 1,1'-Pentamethylenebis(1-methylpyrrolidinium hydrogen tartrate)                                                       |
| 04 | A10 | Chlorpromazine hydrochloride                              |                                                                                            | 12 | A10 | Valproic acid sodium          | 2-Propylpentanoic acid sodium                                                                                         |
| 04 | A11 | Centrophoxine hydrochloride                               | Meclofenoxate hydrochloride                                                                | 12 | A11 | Pyrilamine maleate            | Mepyramine maleate                                                                                                    |
| 04 | B02 | 1-(2-Chlorophenyl)-1-(4-chlorophenyl)-2,2-dichloroethane  | Mitotane                                                                                   | 12 | B02 | Nimodipine                    | 1,4-Dihydro-2,6-dimethyl-4-(3-nitrophenyl)-3,5-pyridinecarboxylic acid 2-methoxyethyl 1-methylethyl ester             |
| 04 | B03 | D-Cycloserine                                             | R(+)-4-Amino-3-isoxazolidinone                                                             | 12 | B03 | NS-1619                       | 1,3-Dihydro-1-[2-hydroxy-5-(trifluoromethyl)phenyl]-5-(trifluoromethyl)-2H-benzimidazol-2-one                         |
| 04 | B04 | Chlorzoxazone                                             | 5-Chloro-2(3H)-benzoxazolone                                                               | 12 | B04 | Oleic Acid                    | Elainic acid                                                                                                          |
| 04 | B05 | Chlorothiazide                                            |                                                                                            | 12 | B05 | TG003                         | (Z)-1-(3-Ethyl-5-methoxy-2,3-dihydrobenzothiazol-2-ylidene)-propan-2-one                                              |
| 04 | B06 | SB 204741                                                 | N-(1-Methyl-1H-indo-5-yl)-N'-(3-methyl-5-isothiazolyl)urea                                 | 12 | B06 | Progesterone                  | 4-Pregnene-3,20-dione                                                                                                 |

|    |     |                                     |                                                                                                     |    |     |                                                       |                                                                                                 |
|----|-----|-------------------------------------|-----------------------------------------------------------------------------------------------------|----|-----|-------------------------------------------------------|-------------------------------------------------------------------------------------------------|
| 04 | B07 | GR 79236X                           | N-[(1S, trans)-2-Hydroxycyclopentyl]adenosine                                                       | 12 | B07 | (±)-Propranolol hydrochloride                         | (±)-1-(Isopropylamino)-3-(1-naphthyloxy)-2-propanol hydrochloride                               |
| 04 | B08 | Cefaclor                            |                                                                                                     | 12 | B08 | 3- $\alpha$ ,21-Dihydroxy-5- $\alpha$ -pregnan-20-one | 5- $\alpha$ -THDOC                                                                              |
| 04 | B09 | Citalopram hydrobromide             | 1-[3-(Dimethylamino)propyl]-1-(4-fluorophenyl)-1,3-dihydro-5-isobenzofurancarbonitrile hydrobromide | 12 | B09 | 1-Phenyl-3-(2-thiazolyl)-2-thiourea                   |                                                                                                 |
| 04 | B10 | Cefsulodin sodium salt hydrate      | Sulcephalosporin                                                                                    | 12 | B10 | Promethazine hydrochloride                            |                                                                                                 |
| 04 | B11 | Clemastine fumarate                 |                                                                                                     | 12 | B11 | Piroxicam                                             | 4-Hydroxy-2-methyl-3-(pyrid-2-yl-carbamoyl)-2H-1,2-benzothiazine 1,1-dioxide                    |
| 04 | C02 | (±)-Chlorpheniramine maleate        |                                                                                                     | 12 | C02 | Nisoxetine hydrochloride                              | LY-94,939                                                                                       |
| 04 | C03 | 8-(4-Chlorophenylthio)-cAMP sodium  |                                                                                                     | 12 | C03 | Naloxonazine dihydrochloride                          | Bis(5- $\alpha$ -4,5-epoxy-3,14,-dihydroxy-17-[2-propenyl]morphinan-6-ylidene)hydrazone         |
| 04 | C04 | L-Cysteinesulfinic Acid             |                                                                                                     | 12 | C04 | Oxymetazoline hydrochloride                           | 3-[(4,5-Dihydro-1H-imidazol-2-yl)methyl]-6-(1,1-dimethylethyl)-2,4-dimethylphenol hydrochloride |
| 04 | C05 | (+)-Chlorpheniramine maleate        | ( $\gamma$ S)- $\gamma$ -(4-Chlorophenyl)-N,N-dimethyl-2-pyridinepropanamine maleate                | 12 | C05 | Ofloxacin                                             | Ofloxacin; DL-8280; HOE-280                                                                     |
| 04 | C06 | Ceftriaxone sodium                  | Ro-13-9904/001                                                                                      | 12 | C06 | Palmitoylethanolamide                                 | Palmidrol                                                                                       |
| 04 | C07 | Cefmetazole sodium                  | CS-1170; SKF-83088                                                                                  | 12 | C07 | SKF-525A hydrochloride                                | Proadifen hydrochloride                                                                         |
| 04 | C08 | DL-Cycloserine                      | 4-amino-3-isoxazolidinone                                                                           | 12 | C08 | Pirfenidone                                           | 5-Methyl-1-phenyl-2-(1H)-pyridone                                                               |
| 04 | C09 | Clonidine hydrochloride             |                                                                                                     | 12 | C09 | Thiolactomycin                                        | [R-(E)]-4-hydroxy-3,5-dimethyl-5-(2-methyl-1,3-butadienyl)-2(5H)-thiophenone                    |
| 04 | C10 | Caffeic acid phenethyl ester        | CAPE                                                                                                | 12 | C10 | Praziquantel                                          | 2-(Cyclohexylcarbonyl)-1,2,3,6,7-11b-hexahydro-4H-pyrazino(2,1a)isoquinolin-4-one               |
| 04 | C11 | beta-Chloro-L-alanine hydrochloride |                                                                                                     | 12 | C11 | 3-n-Propylxanthine                                    | Enprofylline                                                                                    |
| 04 | D02 | Cortisone 21-acetate                | 21-Acetoxy-4-pregnen-17 $\alpha$ -ol-3,11,20-trione                                                 | 12 | D02 | Nylidrin hydrochloride                                |                                                                                                 |
| 04 | D03 | Calmidazolium chloride              | R 24571 chloride                                                                                    | 12 | D03 | NBQX disodium                                         | FG9202 disodium                                                                                 |
| 04 | D04 | 9-cyclopentyladenine                | 9-CP-Ade                                                                                            | 12 | D04 | Sodium Oxamate                                        | Oxalic acid monoamide sodium salt                                                               |
| 04 | D05 | Cefazolin sodium                    | Sodium CEZ; SKF-41558                                                                               | 12 | D05 | Oxotremorine sesquifumarate salt                      | 1-(4-[1-Pyrrolidinyl]-2-butynyl)-2-pyrrolidinone (E)-4-[2-(3,5-                                 |
| 04 | D06 | 4-Chloromercuribenzoic acid         | 4-(Hydroxymercuri)benzoic acid                                                                      | 12 | D06 | Piceatannol                                           | Dihydroxyphenyl]ethenyl]1,2-benzenediol                                                         |
| 04 | D07 | Clozapine                           | 8-Chloro-11-(4-methyl)-1-piperazinyl)-5H-dibenzo[b,e][1,4]diazepine                                 | 12 | D07 | Picrotoxin                                            |                                                                                                 |
| 04 | D08 | McN-A-343                           | (4-Hydroxy-2-butynyl)-1-trimethylammonium-m-chlorocarbamate chloride                                | 12 | D08 | 1,3-Dimethyl-8-phenylxanthine                         | 8-Phenyltheophylline                                                                            |

|    |     |                                                                  |                                                                                                             |    |     |                                      |                                                                                                                             |
|----|-----|------------------------------------------------------------------|-------------------------------------------------------------------------------------------------------------|----|-----|--------------------------------------|-----------------------------------------------------------------------------------------------------------------------------|
| 04 | D09 | Cefotaxime sodium                                                | Cefotaxim sodium                                                                                            | 12 | D09 | Cisplatin                            | cis-Diammineplatinum(II) dichloride                                                                                         |
| 04 | D10 | Cephapirin sodium                                                | BL-P-1322                                                                                                   | 12 | D10 | Propafenone hydrochloride            | 1-(2-[2-Hydroxy-3-(propylamino)propoxy]phenyl)-3-phenyl-1-propanone                                                         |
| 04 | D11 | Pyrocatechol                                                     | 1,2-Benzenediol; Catechol                                                                                   | 12 | D11 | Phenylephrine hydrochloride          |                                                                                                                             |
| 04 | E02 | Cephalosporin C zinc salt                                        |                                                                                                             | 12 | E02 | SB 242084 dihydrochloride hydrate    | 6-Chloro-2,3-dihydro-5-methyl-N-[6-[(2-methyl-3-pyridinyl)oxy]-3-pyridinyl]-1H-indole-1-carboxamide dihydrochloride hydrate |
| 04 | E03 | GR 113808                                                        | 1-Methyl-1H-indole-3-carboxylic acid, [1-[2-[(methylsulfonyl)amino]ethyl]-4-piperidinyl]methyl ester        | 12 | E03 | NS 2028                              | 4H-8-Bromo-1,2,4-oxadiazolo(3,4-d)benz(b)(1,4)oxazin-1-one                                                                  |
| 04 | E04 | Cephalothin sodium                                               |                                                                                                             | 12 | E04 | Oxybutynin Chloride                  | alpha-Phenylcyclohexaneglycolic acid 4-(diethylamino)-2-butynyl ester hydrochloride                                         |
| 04 | E05 | Clemizole hydrochloride                                          | 1-p-Chlorobenzyl-2-(1-pyrrolidinyl)methylbenzimidazole hydrochloride                                        | 12 | E05 | TPCA-1                               | [5-(p-Fluorophenyl)-2-ureido]thiophene-3-carboxamide                                                                        |
| 04 | E06 | (-)-Cotinine                                                     | S(-)-1-Methyl-5-(3-pyridyl)-2-pyrrolidone                                                                   | 12 | E06 | Pentamidine isethionate              | 4'-[1,5-Pentanediy]bis(oxy))bis-benzenecarboximidamide isethionate                                                          |
| 04 | E07 | (±)-p-Chlorophenylalanine                                        | p-CPA                                                                                                       | 12 | E07 | 4-Phenyl-3-furoxancarbonitrile       | Furoxan                                                                                                                     |
| 04 | E08 | N-(2-[4-(4-Chlorophenyl)piperazin-1-yl]ethyl)-3-methoxybenzamide |                                                                                                             | 12 | E08 | PRE-084                              |                                                                                                                             |
| 04 | E09 | Cilostamide                                                      | OPC 3689                                                                                                    | 12 | E09 | Podophyllotoxin                      |                                                                                                                             |
| 04 | E10 | Cephradine                                                       | Cefradin; SQ-11436                                                                                          | 12 | E10 | 5alpha-Pregnan-3alpha-ol-11,20-dione | Alfaxalone                                                                                                                  |
| 04 | E11 | Z-L-Phe chloromethyl ketone                                      | N-Carbobenzyloxy-L-phenylalanyl chloromethyl ketone; ZPCK                                                   | 12 | E11 | Perphenazine                         |                                                                                                                             |
| 04 | F02 | CGP-74514A hydrochloride                                         | N2-(cis-2-Aminocyclohexyl)-N6-(3-chlorophenyl)-9-ethyl-9H-purine-2,6-diamine hydrochloride; Compound 13     | 12 | F02 | Naltriben methanesulfonate           | NTB                                                                                                                         |
| 04 | F03 | Carbamazepine                                                    | 5H-Dibenz[b,f]azepine-5-carboxamide                                                                         | 12 | F03 | (±)-Octopamine hydrochloride         | (±)-alpha-(Aminomethyl)-4-hydroxybenzyl alcohol hydrochloride                                                               |
| 04 | F04 | Cimetidine                                                       | SKF-92334; Tagamet                                                                                          | 12 | F04 | Oxiracetam                           | 4-Hydroxy-2-oxopyrrolidine-N-acetamide                                                                                      |
| 04 | F05 | 2-Chloroadenosine                                                | 2-CADO                                                                                                      | 12 | F05 | SB 216763                            | 3-(2,4-Dichlorophenyl)-4-(1-methyl-1H-indol-3-yl)-1H-pyrrole-2,5-dione                                                      |
| 04 | F06 | CL 316,243                                                       | Disodium 5-[(2R)-2-[(2R)-2-(3-Chlorophenyl)-2-hydroxyethyl]amino]propyl]-1,3-benzodioxole-2,2-dicarboxylate | 12 | F06 | TBB                                  | NSC 231634; 4,5,6,7-Tetrabromo-2-azabenzimidazole                                                                           |
| 04 | F07 | Chloroquine diphosphate                                          |                                                                                                             | 12 | F07 | Pentoxifylline                       | 3,7-Dihydro-3,7-dimethyl-1-(5-oxohexyl)-1H-purine-2,6-dione                                                                 |
| 04 | F08 | Cystamine dihydrochloride                                        | Decarboxycystine dihydrochloride                                                                            | 12 | F08 | PPNDS tetrasodium                    | Pyridoxal-5'-phosphate-6-(2'-naphthylazo-6'-nitro-4',8'-disulfonate) tetrasodium                                            |

|    |     |                                                     |                                                                                                            |    |     |                                 |                                                                                     |
|----|-----|-----------------------------------------------------|------------------------------------------------------------------------------------------------------------|----|-----|---------------------------------|-------------------------------------------------------------------------------------|
| 04 | F09 | Chelidamic acid                                     | 4-Hydroxypyridine-2,6-dicarboxylic acid                                                                    | 12 | F09 | SU 9516                         |                                                                                     |
| 04 | F10 | DSP-4 hydrochloride                                 | N-(2-Chloroethyl)-N-ethyl-2-bromobenzylamine hydrochloride                                                 | 12 | F10 | PNU-282987                      | N-(3R)-1-Azabicyclo[2.2.2]oct-3-yl-4-chloro-benzamide monohydrochloride             |
| 04 | F11 | CPCCOEt                                             | (Hydroxyimino)cyclopropa[b]chromen-1a-carboxylate ethyl ester                                              | 12 | F11 | Pentylene tetrazole             | Metrazole                                                                           |
| 04 | G02 | Cyproterone acetate                                 | 6-Chloro-1beta,2beta-dihydro-17-hydroxy-3'H-cyclopropa(1,2)-pregna-1,4,6-triene-3,20-dione acetate         | 12 | G02 | Naftopidil dihydrochloride      | KT-611 dihydrochloride                                                              |
| 04 | G03 | Captopril                                           | (S)-1-(3-Mercapto-2-methyl-1-oxo-propyl)-L-proline 5-(3-                                                   | 12 | G03 | N-Oleoyl ethanolamine           | N-(Hydroxyethyl)oleamide                                                            |
| 04 | G04 | Cyclobenzaprine hydrochloride                       | Dimethylaminopropylidene) dibenzo[a,e]cycloheptatriene hydrochloride                                       | 12 | G04 | Ouabain                         | Acocantherine                                                                       |
| 04 | G05 | Bethanechol chloride                                | Carbamyl-beta-methylcholine chloride                                                                       | 12 | G05 | Oxaprozin                       | Daypro                                                                              |
| 04 | G06 | 7-Chloro-4-hydroxy-2-phenyl-1,8-naphthyridine       |                                                                                                            | 12 | G06 | Parthenolide                    |                                                                                     |
| 04 | G07 | Clofibrate                                          |                                                                                                            | 12 | G07 | Pimozide                        |                                                                                     |
| 04 | G08 | Clomipramine hydrochloride                          | Anafranil hydrochloride; Chloripramine                                                                     | 12 | G08 | PD 404,182                      | 6H-6-Imino-(2,3,4,5-tetrahydropyrimido)[1,2-c]-[1,3]benzothiazine                   |
| 04 | G09 | N6-Cyclopentyladenosine                             | CPA                                                                                                        | 12 | G09 | Palmitoyl-DL-Carnitine chloride |                                                                                     |
| 04 | G10 | Cinoxacin                                           | 1-Ethyl-1,4-dihydro-4-oxo[1,3]dioxolo[4,5-g]cinnoline-3-carboxylic acid                                    | 12 | G10 | Piracetam                       | 2-Oxo-1-pyrrolidineacetamide                                                        |
| 04 | G11 | Colchicine                                          |                                                                                                            | 12 | G11 | (+)-Pilocarpine hydrochloride   |                                                                                     |
| 04 | H02 | DL-p-Chlorophenylalanine methyl ester hydrochloride |                                                                                                            | 12 | H02 | Bisoprolol hemifumarate salt    | 1-[4-[[2-(1-Methylethoxy)ethoxy]methyl]phenoxy]-3-[(1-methylethyl)amino]-2-propanol |
| 04 | H03 | CNS-1102                                            | N-(3-Ethylphenyl)-N-methyl-N'-1-naphthalenylguanidine monohydrochloride; Cerestat; Aptiganel hydrochloride | 12 | H03 | Oxolinic acid                   | W-4565; 5,8-Dihydro-5-ethyl-8-oxo-1,3-dioxolo[4,5-g]quinoline-7-carboxylic acid     |
| 04 | H04 | Carbetapentane citrate                              | 1-Phenyl-cyclopentanecarboxylic acid 2-[2-(Diethylamino)ethoxy]ethyl ester citrate                         | 12 | H04 | ODQ                             | 1H-[1,2,4]Oxadiazolo[4,3-a]quinoxalin-1-one                                         |
| 04 | H05 | Cinnarizine                                         | 1-trans-Cinnamyl-4-diphenylmethylpiperazine                                                                | 12 | H05 | Oxotremorine methiodide         | N,N,N-Trimethyl-4-(2-oxo-1-pyrrolidinyl)-2-butyln-1-ammonium iodide                 |
| 04 | H06 | Clotrimazole                                        | 1-(o-Chlorotriyl)imidazole                                                                                 | 12 | H06 | Pindolol                        |                                                                                     |
| 04 | H07 | Cytosine-1-beta-D-arabinofuranoside hydrochloride   | Arabinocytidine hydrochloride; Arabinosylcytosine hydrochloride; Ara-C hydrochloride                       | 12 | H07 | L-Glutamic acid, N-phthaloyl-   |                                                                                     |



|    |     |                                   |                                                                                               |    |     |                                          |                                                                                                           |
|----|-----|-----------------------------------|-----------------------------------------------------------------------------------------------|----|-----|------------------------------------------|-----------------------------------------------------------------------------------------------------------|
| 04 | H08 | Calcimycin                        | A23187; Calcium ionophore A23187                                                              | 12 | H08 | Papaverine hydrochloride                 |                                                                                                           |
| 04 | H09 | Cantharidic Acid                  |                                                                                               | 12 | H09 | R(-)-N6-(2-Phenylisopropyl)adenosine     | R(-)-PIA                                                                                                  |
| 04 | H10 | Carisoprodol                      |                                                                                               | 12 | H10 | Phosphomycin disodium                    | Fosfomycin; Phosphonomycin; MK-955                                                                        |
| 04 | H11 | L-Canavanine sulfate              | L-alpha-Amino-gamma-(guanidinooxy)butyric acid sulfate                                        | 12 | H11 | Pilocarpine nitrate                      |                                                                                                           |
| 05 | A02 | Cyclothiazide                     | 6-Chloro-3,4-dihydro-3-(2-norbornen-5-yl)-2H-1,2,4-benzothiadiazine-7-sulfonamide 1,1-dioxide | 13 | A02 | Promazine hydrochloride                  | 10-(3-[Dimethylamino]propyl)phenothiazine hydrochloride                                                   |
| 05 | A03 | (±)-CPP                           | (±)-3-(2-Carboxypiperazin-4-yl)propyl-1-phosphonic acid                                       | 13 | A03 | Pirenzepine dihydrochloride              | 5,11-Dihydro-11-[(4-methyl-1-piperazinyl)acetyl]-6H-pyrido[2,3-b][1,4]benzodiazepin-6-one dihydrochloride |
| 05 | A04 | CGS-21680 hydrochloride           | 2-p-(2-Carboxyethyl)phenethylamine-5'-N-ethylcarboxamidoadenosine hydrochloride               | 13 | A04 | 1,3-PBIT dihydrobromide                  | Phenylene-1,3-bis(ethane-2-isothioureia) dihydrobromide                                                   |
| 05 | A05 | CGS-15943                         | 9-Chloro-2-(2-furyl)[1,2,4]triazolo[1,5-c]quinazolin-5-amine                                  | 13 | A05 | (±)-cis-Piperidine-2,3-dicarboxylic acid |                                                                                                           |
| 05 | A06 | Chloro-IB-MECA                    | 2-Chloro-N6-(3-iodobenzyl)-adenosine-5'-N-methyluronamide                                     | 13 | A06 | Piribedil maleate                        | 2-(4-[1,3-Benzodioxol-5-ylmethyl]-1-piperazinyl)pyrimidine                                                |
| 05 | A07 | Debrisoquin sulfate               | 3,4-Dihydro-2(1H)-isoquinolinecarboximidamide sulfate; Ro 5-33071                             | 13 | A07 | Procaine hydrochloride                   | Novocaine hydrochloride                                                                                   |
| 05 | A08 | Diltiazem hydrochloride           |                                                                                               | 13 | A08 | Phaclofen                                | 3-Amino-2-(4-chlorophenyl)propylphosphonic acid                                                           |
| 05 | A09 | (S)-3,5-Dihydroxyphenylglycine    | S-DHPG                                                                                        | 13 | A09 | Pregnenolone sulfate sodium              | 5-Pregnen-3beta-ol-20-one sulfate sodium                                                                  |
| 05 | A10 | Phenytoin sodium                  | 5,5-Diphenylhydantoin sodium                                                                  | 13 | A10 | PD 168,077 maleate                       | N-[[4-(2-Cyanophenyl)-1-piperazinyl]methyl]-3-methylbenzamide maleate                                     |
| 05 | A11 | Daphnetin                         | 7,8-Dihydroxycoumarin                                                                         | 13 | A11 | Quinacrine dihydrochloride               |                                                                                                           |
| 05 | B02 | N6-Cyclohexyladenosine            | CHA                                                                                           | 13 | B02 | Phenelzine sulfate                       |                                                                                                           |
| 05 | B03 | CGS-12066A maleate                | 7-Trifluoromethyl-4(4-methyl-1-piperazinyl)-pyrrolo[1,2-a]quinoxaline maleate                 | 13 | B03 | Putrescine dihydrochloride               | Putrescine dihydrochloride                                                                                |
| 05 | B04 | Y-27632 dihydrochloride           | (R)-(+)-trans-4-(1-Aminoethyl)-N-(4-Pyridyl)cyclohexanecarboxamide dihydrochloride            | 13 | B04 | Protoporphyrin IX disodium               | Kammerer's porphyrin                                                                                      |
| 05 | B05 | 2-Chloro-2-deoxy-D-glucose        | 2-Chloro-DG                                                                                   | 13 | B05 | Protriptyline hydrochloride              |                                                                                                           |
| 05 | B06 | WB-4101 hydrochloride             | 2-(2,6-Dimethoxyphenoxyethyl)aminomethyl-1,4-benzodioxane hydrochloride                       | 13 | B06 | Paromomycin sulfate                      |                                                                                                           |
| 05 | B07 | 2',3'-didehydro-3'-deoxythymidine | 2',3'-Anhydrothymidine; d4T                                                                   | 13 | B07 | 2-Phenylaminoadenosine                   | CV-1808                                                                                                   |

|    |     |                                                         |                                                                                    |    |     |                                  |                                                                                                           |
|----|-----|---------------------------------------------------------|------------------------------------------------------------------------------------|----|-----|----------------------------------|-----------------------------------------------------------------------------------------------------------|
| 05 | B08 | Dextromethorphan hydrobromide monohydrate               | d-3-Methoxy-N-methylmorphinan hydrobromide                                         | 13 | B08 | BF-170 hydrochloride             | 2-(4-Aminophenyl)quinoline hydrochloride                                                                  |
| 05 | B09 | Dequalinium chloride hydrate                            | 1,1'-Decamethylenebis(4-aminoquinaldinium) dichloride                              | 13 | B09 | PPADS                            | Pyridoxal-phosphate-6-azophenyl-2',4'-disulphonic acid tetrasodium                                        |
| 05 | B10 | Doxepin hydrochloride                                   |                                                                                    | 13 | B10 | SU 6656                          | 2,3-Dihydro-N,N-dimethyl-2-oxo-3-[(4,5,6,7-tetrahydro-1H-indol-2-yl)methylene]-1H-indole-5-sulfonamide    |
| 05 | B11 | DM 235                                                  |                                                                                    | 13 | B11 | Quazinone                        | Ro 13-6438                                                                                                |
| 05 | C02 | (S)-(+)-Camptothecin                                    |                                                                                    | 13 | C02 | Pheniramine maleate              |                                                                                                           |
| 05 | C03 | 2-Cyclooctyl-2-hydroxyethylamine hydrochloride          | CONH hydrochloride                                                                 | 13 | C03 | Phentolamine mesylate            | Regitin mesylate                                                                                          |
| 05 | C04 | 1-(m-Chlorophenyl)-biguanide hydrochloride              | m-CPBG hydrochloride                                                               | 13 | C04 | 1,4-PBIT dihydrobromide          | 1,4-Phenylene-bis(1,2-ethanediy)bis-isothiourea                                                           |
| 05 | C05 | Tocainide hydrochloride                                 | 2-Amino-N-(2,6-dimethylphenyl)propanamide hydrochloride                            | 13 | C05 | Pergolide methanesulfonate       | 8-[(Methylthio)methyl]-6-propylergoline methanesulfonate                                                  |
| 05 | C06 | DNQX                                                    | 6,7-Dinitroquinoxaline-2,3-dione                                                   | 13 | C06 | 1,10-Phenanthroline monohydrate  | o-Phenanthroline monohydrate                                                                              |
| 05 | C07 | Droperidol                                              | 1-[1-[3-(p-Fluorobenzoyl)propyl]-1,2,3,6-tetrahydro-4-pyridyl]-2-benzimidazolinone | 13 | C07 | R(+)-3PPP hydrochloride          | R(+)-3-(3-Hydroxyphenyl)-N-propylpiperidine hydrochloride                                                 |
| 05 | C08 | Carvedilol                                              | 1-(9H-Carbazol-4-yloxy)-3-[[2-(2-methoxyphenoxy)ethyl]amino]-2-propanol            | 13 | C08 | 1-Phenylbiguanide                | N-Phenyl-imidocarbonimidic diamide                                                                        |
| 05 | C09 | Doxylamine succinate                                    |                                                                                    | 13 | C09 | S(+)-PD 128,907 hydrochloride    | S(+)-(4aR,10bR)-3,4,4a,10b-Tetrahydro-4-propyl-2H,5H-[1]benzopyrano-[4,3-b]-1,4-oxazin-9-ol hydrochloride |
| 05 | C10 | S(-)-Pindolol                                           |                                                                                    | 13 | C10 | Quinolinic acid                  | Pyridine-2,3-dicarboxylic acid                                                                            |
| 05 | C11 | 5,5-Dimethyl-1-pyrroline-N-oxide                        | DMPO                                                                               | 13 | C11 | (-)-Quinpirole hydrochloride     | LY-171,555                                                                                                |
| 05 | D02 | CK2 Inhibitor 2                                         | DMAT; 2-Dimethylamino-4,5,6,7-tetrabromo-1H-benzimidazole                          | 13 | D02 | Phosphonoacetic acid             |                                                                                                           |
| 05 | D03 | 5-Carboxamidotryptamine maleate                         | 5-CT; AH-21467                                                                     | 13 | D03 | Propionylpromazine hydrochloride |                                                                                                           |
| 05 | D04 | 2-Chloroadenosine triphosphate tetrasodium              | 2-Chloro-ATP tetrasodium                                                           | 13 | D04 | Phenylbutazone                   |                                                                                                           |
| 05 | D05 | Cirazoline hydrochloride                                | 2-[(2-Cyclopropylphenoxy)methyl]-4,5-dihydro-1H-imidazole hydrochloride            | 13 | D05 | 6(5H)-Phenanthridinone           |                                                                                                           |
| 05 | D06 | Dihydroouabain                                          |                                                                                    | 13 | D06 | Procainamide hydrochloride       |                                                                                                           |
| 05 | D07 | L-3,4-Dihydroxyphenylalanine methyl ester hydrochloride | Methyl L-DOPA hydrochloride                                                        | 13 | D07 | S(-)-3PPP hydrochloride          | Preclamol hydrochloride                                                                                   |
| 05 | D08 | Dihydroergotamine methanesulfonate                      |                                                                                    | 13 | D08 | SKF 94836                        | N-Cyano-N'-methyl-N''-[4-(1,4,5,6-tetrahydro-4-methyl-6-oxo-3-pyridazinyl)phenyl]guanidine                |
| 05 | D09 | Desipramine hydrochloride                               |                                                                                    | 13 | D09 | Phenamyl methanesulfonate        | 3,5-Diamino-6-chloro-N-[imino(phenylamino)methyl]-pyrazinecarboxamide methansulfonate                     |

|    |     |                                                           |                                                                                                                                              |    |     |                                                |                                                                                        |
|----|-----|-----------------------------------------------------------|----------------------------------------------------------------------------------------------------------------------------------------------|----|-----|------------------------------------------------|----------------------------------------------------------------------------------------|
| 05 | D10 | (-)-alpha-Methylnorepinephrine                            | Levonordefrin; (-)-3,4-Dihydroxynorephedrine                                                                                                 | 13 | D10 | Quercetin dihydrate                            | 3,3',4',5,7-Pentahydroxyflavone dihydrate                                              |
| 05 | D11 | 2',3'-dideoxycytidine                                     | ddC                                                                                                                                          | 13 | D11 | Quipazine, N-methyl-, dimaleate                | 2-[1-(4-Methyl)-piperaziny]quinoline dimaleate                                         |
| 05 | E02 | (+)-cis-Dioxolane                                         | L(+)-cis-2-Methyl-4-trimethylammoniummethyl-1,3-dioxolane iodide                                                                             | 13 | E02 | (-)-Perillic acid                              | 4-Isopropenyl-1-cyclohexene-1-carboxylic acid                                          |
| 05 | E03 | Cetirizine dihydrochloride                                | Chlorophenylphenylmethyl]-1-piperaziny]ethoxy]acetic acid dihydrochloride                                                                    | 13 | E03 | Prazosin hydrochloride                         |                                                                                        |
| 05 | E04 | (+)-Cyclazocine                                           |                                                                                                                                              | 13 | E04 | Picotamide                                     | 4-Methoxy-N,N'-bis(3-pyridinylmethyl)-1,3-benzenedicarboxamide                         |
| 05 | E05 | CGP 20712A methanesulfonate                               | (+/-)-2-Hydroxy-5-[2-[[2-hydroxy-3-[4-[1-methyl-4-(trifluoromethyl)-1H-imidazol-2-yl]phenoxy]propyl]amino]ethoxy]-benzamide methanesulfonate | 13 | E05 | 5alpha-Pregnan-3alpha-ol-20-one                | Allopregnan-3alpha-ol-20-one                                                           |
| 05 | E06 | Dobutamine hydrochloride                                  | (±)-4-[2-[[3-(4-Hydroxyphenyl)-1-methylpropyl]amino]ethyl]-1,2-benzenediol hydrochloride                                                     | 13 | E06 | Prilocaine hydrochloride                       | N-(2-Methylphenyl)-2-(propylamino)propanamide hydrochloride                            |
| 05 | E07 | 1,4-Dideoxy-1,4-imino-D-arabinitol                        | DAB; 2-Hydroxymethyl-3,4-pyrrolidinediol                                                                                                     | 13 | E07 | (±)-PPHT hydrochloride                         | (±)-2-(N-Phenylethyl)-N-propylamino-5-hydroxytetralin hydrochloride                    |
| 05 | E08 | Diphenyleneiodonium chloride                              | [1,1'-Biphenyl]-2,2'-diiodonium chloride                                                                                                     | 13 | E08 | Pirenperone                                    | R-47,465                                                                               |
| 05 | E09 | N-Methyl-1-deoxynojirimycin                               | 1,5-Dideoxy-1,5-imino-1-methyl-D-sorbitol                                                                                                    | 13 | E09 | Phenylbenzene-omega-phosphono-alpha-amino acid | PMBA                                                                                   |
| 05 | E10 | Dilazep hydrochloride                                     | Cormelian                                                                                                                                    | 13 | E10 | Quinidine sulfate                              |                                                                                        |
| 05 | E11 | Diacylglycerol Kinase Inhibitor II                        | R59949                                                                                                                                       | 13 | E11 | Quipazine, 6-nitro-, maleate                   | 6-Nitro-2-(1-piperziny)-quinoline maleate                                              |
| 05 | F02 | OXA-22                                                    | cis-2-Methyl-5-trimethylammoniummethyl-1,3-oxathiolane iodide                                                                                | 13 | F02 | Pyrazinecarboxamide                            | Pyrazinoic acid amide; pyrazinamide; PZA                                               |
| 05 | F03 | (±)-CGP-12177A hydrochloride                              | 4-[4-[(1,1-Dimethylethyl)amino]-2-hydroxypropoxy]-1,3-dihydro-2H-benzimidazol-2-one hydrochloride                                            | 13 | F03 | Phloretin                                      | 3-(4-Hydroxyphenyl)-1-(2,4,6-trihydroxyphenyl)-1-propanone                             |
| 05 | F04 | Capsazepine                                               | N-[2-(4-Chlorophenyl)ethyl]-1,3,4,5-tetrahydro-7,8-dihydroxy-2H-2-benzazepine-2-carbothioamide                                               | 13 | F04 | Tranlycypromine hydrochloride                  | (±)-trans-2-Phenylcyclopropylamine hydrochloride                                       |
| 05 | F05 | (2S,1'S,2'S)-2-(carboxycyclopropyl)glycine                | L-CCG-1                                                                                                                                      | 13 | F05 | Propantheline bromide                          | (2-Hydroxyethyl)diisopropylmethylammonium bromide xanthene-9-carboxylate bromide       |
| 05 | F06 | Dihydrokainic acid                                        | 2-Carboxy-4-isopropyl-3-pyrrolidineacetic acid                                                                                               | 13 | F06 | Propentofylline                                | HWA 285                                                                                |
| 05 | F07 | 2,4-Dinitrophenyl 2-fluoro-2-deoxy-beta-D-glucopyranoside |                                                                                                                                              | 13 | F07 | Org 27569                                      | 5-chloro-3-ethyl-1H-indole-2-carboxylic acid [2-(4-piperidin-1-yl-phenyl)-ethyl]-amide |

|    |     |                                                  |                                                                                  |    |     |                                                                          |                                                                                       |
|----|-----|--------------------------------------------------|----------------------------------------------------------------------------------|----|-----|--------------------------------------------------------------------------|---------------------------------------------------------------------------------------|
| 05 | F08 | Diphenhydramine hydrochloride                    |                                                                                  | 13 | F08 | IC 261                                                                   | 1,3-Dihydro-3-[(2,4,6-trimethoxyphenyl)methylene]-2H-indol-2-one                      |
| 05 | F09 | 5,5-Diphenylhydantoin                            | Phenytoin                                                                        | 13 | F09 | Bay 11-7082                                                              | (E)-3-(4-Methylphenylsulfonyl)-2-propenenitrile                                       |
| 05 | F10 | Ganaxolone                                       | 3a-Hydroxy-3beta-methyl-5a-pregnan-20-one                                        | 13 | F10 | Quipazine dimaleate                                                      | 2-(1-Piperazinyl)quinoline dimaleate                                                  |
| 05 | F11 | Tyrphostin AG 1296                               | 6,7-Dimethoxy-2-phenylquinoxaline                                                | 13 | F11 | Quinelorane dihydrochloride                                              | LY-163,502                                                                            |
| 05 | G02 | 8-Cyclopentyl-1,3-dipropylxanthine               | DPCTX; PD 116,948                                                                | 13 | G02 | Primidone                                                                |                                                                                       |
| 05 | G03 | S(-)-Carbidopa                                   |                                                                                  | 13 | G03 | Pargyline hydrochloride                                                  | N-Methyl-N-2-propynylbenzylamine hydrochloride                                        |
| 05 | G04 | Chlormezanone                                    | 2-(4-Chlorophenyl)tetrahydro-3-methyl-4H-1,3-thiazin-4-one 1,1-dioxide           | 13 | G04 | (S)-Propranolol hydrochloride                                            | (S)-1-Isopropylamino-3-(1-naphthylloxy)-2-propanol hydrochloride                      |
| 05 | G05 | CNQX disodium                                    | 6-Cyano-7-nitroquinoxaline-2,3-dione                                             | 13 | G05 | K114                                                                     | trans,trans)-1-Bromo-2,5-bis-(4-hydroxy)styrylbenzene                                 |
| 05 | G06 | Decamethonium dibromide                          | Decamethylene bis(trimethylammonium bromide)                                     | 13 | G06 | (S)-(-)-propafenone hydrochloride                                        | (S)-1-(2-[2-Hydroxy-3-(propylamino)propoxy]phenyl)-3-phenyl-1-propanone hydrochloride |
| 05 | G07 | D-ribofuranosylbenzimidazole                     | DRB; 5,6-Dichlorobenzimidazole riboside                                          | 13 | G07 | N6-2-Phenylethyladenosine                                                |                                                                                       |
| 05 | G08 | 2,3-Butanedione                                  | Biacetyl; BDM                                                                    | 13 | G08 | A3 hydrochloride                                                         | N-(2-Aminoethyl)-5-chloronaphthalene-1-sulfonamide hydrochloride                      |
| 05 | G09 | N^G,N^G-Dimethylarginine hydrochloride           | asym-Dimethylarginine hydrochloride ADMA                                         | 13 | G09 | PD 98,059                                                                | 2-(2-Amino-3-methoxyphenyl)-4H-1-benzopyran-4-one                                     |
| 05 | G10 | 1,7-Dimethylxanthine                             | Paraxanthine                                                                     | 13 | G10 | Quinine sulfate                                                          |                                                                                       |
| 05 | G11 | N-Methyl dopamine hydrochloride                  | Epinine hydrochloride; Deoxyepinephrine hydrochloride                            | 13 | G11 | (±)-Quinpirole dihydrochloride                                           | LY-141,865                                                                            |
| 05 | H02 | 8-Cyclopentyl-1,3-dimethylxanthine               | CPT; 8-Cyclopentyltheophylline                                                   | 13 | H02 | (±)-threo-1-Phenyl-2-decanoylamino-3-morpholino-1-propanol hydrochloride | PDMP hydrochloride                                                                    |
| 05 | H03 | (±)-Chloro-APB hydrobromide                      | (±)-SKF-82958 hydrobromide                                                       | 13 | H03 | Phorbol 12-myristate 13-acetate                                          | PMA                                                                                   |
| 05 | H04 | 8-(3-Chlorostyryl)caffeine                       | CSC                                                                              | 13 | H04 | Ammonium pyrrolidinedithiocarbamate                                      | APDC                                                                                  |
| 05 | H05 | CX 546                                           | 1-(1,4-Benzodioxan-6-ylcarbonyl)piperidine                                       | 13 | H05 | Prochlorperazine dimaleate                                               |                                                                                       |
| 05 | H06 | P1,P4-Di(adenosine-5')tetraphosphate triammonium | Ap4A                                                                             | 13 | H06 | Pyridostigmine bromide                                                   |                                                                                       |
| 05 | H07 | SANT-1                                           | (4-Benzyl-piperazin-1-yl)-(3,5-dimethyl-1-phenyl-1H-pyrazol-4-ylmethylene)-amine | 13 | H07 | N6-Phenyladenosine                                                       |                                                                                       |
| 05 | H08 | N,N,N',N'-Tetramethylazodicarboxamide            | Azodicarboxylic acid bis(dimethylamide); diamide                                 | 13 | H08 | Pinacidil                                                                | (±)-N-Cyano-N'-4-pyridinyl-N''-(1,2,2-trimethylpropyl)-guanidine                      |
| 05 | H09 | Clodronic acid                                   | Cl2MDP; Clodronic acid disodium magnesium salt; DMDP                             | 13 | H09 | (±)-PD 128,907 hydrochloride                                             | PD 125,530                                                                            |

|    |     |                                              |                                                                       |    |     |                             |                                                                                                          |
|----|-----|----------------------------------------------|-----------------------------------------------------------------------|----|-----|-----------------------------|----------------------------------------------------------------------------------------------------------|
| 05 | H10 | 2,3-Dimethoxy-1,4-naphthoquinone             | DMNQ                                                                  | 13 | H10 | (+)-Quisqualic acid         | L(+)-alpha-Amino-3,5-dioxo-1,2,4-oxadiazolidine-2-propanoic acid                                         |
| 05 | H11 | 1,1-Dimethyl-4-phenyl-piperazinium iodide    | DMPP                                                                  | 13 | H11 | Cortexolone                 | 11-Deoxycortisol                                                                                         |
| 06 | A02 | PD 169316                                    | 4-(4-Fluorophenyl)-2-(4-nitrophenyl)-5-(4-pyridyl)-1H-imidazole       | 14 | A02 | Ritodrine hydrochloride     | N-(p-Hydroxyphenethyl)-4-hydroxynorephedrine hydrochloride                                               |
| 06 | A03 | Disopyramide                                 | alpha-Diisopropylaminoethyl-alpha-phenylpyridine-2-acetamide          | 14 | A03 | REV 5901                    | alpha-Pentyl-3-[2-quinolinylmethoxy]benzyl alcohol                                                       |
| 06 | A04 | Dephostatin                                  | 2-(N-methyl-N-nitroso)hydroquinone                                    | 14 | A04 | Ro 8-4304                   | (4-[3-(4-[4-fluorophenyl]-3,6-dihydro-2H-pyridin-1-yl)-2-hydroxypropoxy]benzamide                        |
| 06 | A05 | Diazoxide                                    |                                                                       | 14 | A05 | Ro 41-0960                  | 2'-Fluoro-3,4-dihydroxy-5-nitrobenzophenone                                                              |
| 06 | A06 | Doxycycline hydrochloride                    |                                                                       | 14 | A06 | Ro 04-6790 dihydrochloride  | 4-Amino-N-[2,6-bis(methylamino)-4-pyrimidinyl]-benzenesulfonamide dihydrochloride                        |
| 06 | A07 | R(-)-N-Allylnorapomorphine hydrobromide      |                                                                       | 14 | A07 | ST-148                      | N-(4-[4-(2-methoxyphenyl)-piperazin-1-yl]-butyl-5-(dimethylamino)-naphthalene-1-sulfonamide maleate      |
| 06 | A08 | 4-DAMP methiodide                            | 4-Diphenylacetoxo-N-methylpiperidine methiodide                       | 14 | A08 | Spermidine trihydrochloride | N-(3-Aminopropyl)-1,4-butanediamine trihydrochloride                                                     |
| 06 | A09 | N,N-Dipropyl-5-carboxamidotryptamine maleate |                                                                       | 14 | A09 | SB 204070 hydrochloride     | 1-Butyl-4-piperidinylmethyl-8-amino-7-chloro-2,3-dihydro-1,4-benzodioxin-5-carboxylate hydrochloride     |
| 06 | A10 | Dihydroergocristine methanesulfonate         |                                                                       | 14 | A10 | IRAK-1/4 Inhibitor I        | 1-(2-(4-Morpholinyl)ethyl)-2-(3-nitrobenzoylamino)benzimidazole                                          |
| 06 | A11 | Enoximone                                    | 1,3-Dihydro-4-methyl-5-[4-methylthiobenzoyl]-2H-imidazol-2-one        | 14 | A11 | (±)-Sulpiride               | (±)-5-(Aminosulfonyl)-N-[(1-ethyl-2-pyrrolidinyl)methyl]-2-methoxybenzamide                              |
| 06 | B02 | Disopyramide phosphate                       |                                                                       | 14 | B02 | Raloxifene hydrochloride    | LY 139481                                                                                                |
| 06 | B03 | Daidzein                                     | 7-Hydroxy-3-(4-hydroxyphenyl)-4H-1-benzopyran-4-one                   | 14 | B03 | Rottlerin                   | Mallotoxin                                                                                               |
| 06 | B04 | 3',4'-Dichlorobenzamil                       | L-594,881                                                             | 14 | B04 | RX 821002 hydrochloride     | 2-[2-(2-Methoxy-1,4-benzodioxanyl)]-imidazoline hydrochloride                                            |
| 06 | B05 | 3,4-Dihydroxyphenylacetic acid               | DOPAC                                                                 | 14 | B05 | Reactive Blue 2             | Basilen blue E-3G                                                                                        |
| 06 | B06 | 6,7-ADTN hydrobromide                        | (±)-2-Amino-6,7-dihydroxy-1,2,3,4-tetrahydro-naphthalene hydrobromide | 14 | B06 | (±)-Sotalol hydrochloride   | N-(4-[1-Hydroxy-2-(isopropylamino)ethyl]phenyl) methanesulfonamide hydrochloride                         |
| 06 | B07 | Mephetyl tetrazole                           | 1-[2-(4-Methoxyphenyl)ethyl]-5-(1-p-tolylcyclopropyl)-1H-tetrazole    | 14 | B07 | SKF 86466                   | 6-Chloro-2,3,4,5-tetrahydro-3-methyl-1H-3-benzazepine hydrochloride                                      |
| 06 | B08 | 1,3-Dipropyl-7-methylxanthine                |                                                                       | 14 | B08 | SNC80                       | (+)-4-[(alphaR)-alpha-((2S,5R)-4-Allyl-2,5-dimethyl-1-piperazinyl)-3-methoxybenzyl]-N,N-diethylbenzamide |

|    |     |                                                  |                                                                                                                        |    |     |                                |                                                                                                                                                                                                       |
|----|-----|--------------------------------------------------|------------------------------------------------------------------------------------------------------------------------|----|-----|--------------------------------|-------------------------------------------------------------------------------------------------------------------------------------------------------------------------------------------------------|
| 06 | B09 | 6,7-Dichloroquinoxaline-2,3-dione                | DCQX                                                                                                                   | 14 | B09 | N-Oleoyldopamine               | OLDA                                                                                                                                                                                                  |
| 06 | B10 | 2,4-Diamino-6-pyrimidinone                       | DAHP; 2,4-Diamino-6-hydroxypyrimidine                                                                                  | 14 | B10 | SB 269970 hydrochloride        | [R]-3-[2-(2-[4-Methylpiperidin-1-yl]ethyl)pyrrolidine-1-sulfonyl]phenol hydrochloride                                                                                                                 |
| 06 | B11 | Etoposide                                        | Lastet                                                                                                                 | 14 | B11 | CV-3988                        | (+/-)-(3-(N-Octadecylcarbamoyloxy)-2-methoxy)propyl-2-thiazolioethyl phosphate                                                                                                                        |
| 06 | C02 | Demeclocycline hydrochloride                     | 7-chloro-6-demethyltetracycline hydrochloride                                                                          | 14 | C02 | Retinoic acid                  | Vitamin A acid                                                                                                                                                                                        |
| 06 | C03 | Cilnidipine                                      | 1,4-Dihydro-2,6-dimethyl-4-(3-nitrophenyl)-3,5-pyridinedicarboxylic acid 2-methoxyethyl (2E)-3-phenyl-2-propenyl ester | 14 | C03 | Ranolazine dihydrochloride     | N-(2,6-Dimethylphenyl)-4-[2-hydroxy-3-(2-methoxyphenoxy)propyl]-1-piperazineacetamide dihydrochloride; (±) -4-[2-hydroxy-3-(o-methoxyphenoxy)propyl]-1-piperazineaceto-2',6'-xylidide dihydrochloride |
| 06 | C04 | 3-deazaadenosine                                 | 4-Amino-1-(beta-D-ribofuranosyl)-1H-imidazo(4,5)-pyridine 1-([5-(p-Nitrophenyl)furfurylidene]amino)hydantoin           | 14 | C04 | Ribavirin                      | 1-beta-D-Ribofuranosyl-1,2,4-triazole-3-carboxamide                                                                                                                                                   |
| 06 | C05 | Dantrolene sodium                                | R(-)-10-Methoxy-11-hydroxyaporphine hydrochloride                                                                      | 14 | C05 | Riluzole                       | 2-Amino-6-(trifluoromethoxy)-benzothiazole                                                                                                                                                            |
| 06 | C06 | R(-)-Apocodeine hydrochloride                    | AG-3-5; 1-(2-Hydroxyphenyl)-4-(3-nitrophenyl)-1,2,3,6-tetrahydropyrimidin-2-one                                        | 14 | C06 | SB-366791                      | Vanilloid receptor-1 antagonist                                                                                                                                                                       |
| 06 | C07 | Icilin                                           |                                                                                                                        | 14 | C07 | SR 57227A                      | 4-amino-1-(6-chloro-2-pyridyl)-piperidine hydrochloride                                                                                                                                               |
| 06 | C08 | Domperidone                                      |                                                                                                                        | 14 | C08 | SKF 83959 hydrobromide         | 6-chloro-7,8-dihydroxy-3-methyl-1-(3-methylphenyl)-2,3,4,5-tetrahydro-1H-3-benzazepine hydrobromide                                                                                                   |
| 06 | C09 | 3,7-Dimethyl-1-propargylxanthine DL-alpha        | DMPX                                                                                                                   | 14 | C09 | Spirolactone                   |                                                                                                                                                                                                       |
| 06 | C10 | Difluoromethylornithine hydrochloride            | DFMO hydrochloride                                                                                                     | 14 | C10 | Spiperone hydrochloride        | R 5147 hydrochloride; Spiroperidol hydrochloride                                                                                                                                                      |
| 06 | C11 | ET-18-OCH3                                       | 3,5,9-Trioxa-4-phosphaheptacosan-1-aminium                                                                             | 14 | C11 | Sulindac                       | (Z)-5-Fluoro-2-methyl-1-[[4-(methylsulfinyl)phenyl]methylene]-1H-indene-3-acetic acid                                                                                                                 |
| 06 | D02 | Diethylenetriaminepentaacetic acid               | Pentetic acid; DTPA                                                                                                    | 14 | D02 | Ruthenium red                  | Ammoniated ruthenium oxychloride                                                                                                                                                                      |
| 06 | D03 | Dicyclomine hydrochloride                        | 2-(Diethylamino)ethyl 1-cyclohexylcyclohexane-1-carboxylate hydrochloride                                              | 14 | D03 | Rolipram                       | ZK 62711                                                                                                                                                                                              |
| 06 | D04 | Cytidine 5'-diphosphocholine sodium salt hydrate | Citicholine sodium                                                                                                     | 14 | D04 | Ranitidine hydrochloride       | Zantac                                                                                                                                                                                                |
| 06 | D05 | DCEBIO                                           | 5,6-Dichloro-1-ethyl-1,3-dihydro-2H-benzimidazol-2-one                                                                 | 14 | D05 | Steviol                        | (4alpha)-13-Hydroxykaur-16-en-18-oic acid                                                                                                                                                             |
| 06 | D06 | R(-)-Propylnorapomorphine hydrochloride          | R(-)-NPA hydrochloride                                                                                                 | 14 | D06 | Sodium nitroprusside dihydrate | Sodium nitroferricyanide                                                                                                                                                                              |

|    |     |                                                                        |                                                                                                                                                                                             |    |     |                              |                                                                                                        |
|----|-----|------------------------------------------------------------------------|---------------------------------------------------------------------------------------------------------------------------------------------------------------------------------------------|----|-----|------------------------------|--------------------------------------------------------------------------------------------------------|
| 06 | D07 | (±)-SKF-38393 hydrochloride                                            | (±)-1-Phenyl-2,3,4,5-tetrahydro-(1H)-3-benzazepine-7,8-diol hydrochloride                                                                                                                   | 14 | D07 | (-)-Scopolamine hydrobromide | Hyoscine hydrobromide                                                                                  |
| 06 | D08 | Propofol                                                               |                                                                                                                                                                                             | 14 | D08 | Spermine tetrahydrochloride  | N,N'-bis(3-Aminopropyl)-1,4-butanediamine tetrahydrochloride                                           |
| 06 | D09 | 5,7-Dichlorokynurenic acid                                             | 5,7-Dichloro-4-hydroxyquinoline-2-carboxylic acid                                                                                                                                           | 14 | D09 | SCH-202676 hydrobromide      | N-(2,3-diphenyl-1,2,4-thiadiazol-5-(2H)-ylidene)methanamine hydrobromide                               |
| 06 | D10 | SCH-28080                                                              | 2-Methyl-8-(phenylmethoxy)imidazo[1,2-a]pyridine-3-acetonitrile SQ 20,009; 1-Ethyl-4-[(1-methylethylidene)hydrazino]-1H-pyrazolo[3,4-b]pyridine-5-carboxylic acid ethyl ester hydrochloride | 14 | D10 | SR 2640                      | 2-[[3-(2-Quinolinylmethoxy)phenyl]amino]-benzoic acid; QMPB                                            |
| 06 | D11 | Etazolate hydrochloride                                                | 2-[(2,6-Dichlorophenyl)amino]benzeneacetic acid sodium                                                                                                                                      | 14 | D11 | Succinylcholine chloride     |                                                                                                        |
| 06 | E02 | Diclofenac sodium                                                      |                                                                                                                                                                                             | 14 | E02 | 13-cis-retinoic acid         | Isotretinoin                                                                                           |
| 06 | E03 | 3,4-Dichloroisocoumarin                                                | 3,4-DCI                                                                                                                                                                                     | 14 | E03 | Ro 25-6981 hydrochloride     | (R-[R*,S*])-alpha-(4-Hydroxyphenyl)-beta-methyl-4-(phenylmethyl)-1-piperidinepropanol) hydrochloride   |
| 06 | E04 | Danazol                                                                |                                                                                                                                                                                             | 14 | E04 | Ritanserine                  | 6-[2-[4-bis(4-Fluorophenyl)methylene]-1-piperidinyl]-ethyl]-7-methyl-5H-thiazolo[3,2-a]pyrimidin-5-one |
| 06 | E05 | 1-Deoxynojirimycin hydrochloride                                       | DNM; 1,5-Dideoxy-1,5-imino-D-sorbitol hydrochloride                                                                                                                                         | 14 | E05 | S(+)-Raclopride L-tartrate   |                                                                                                        |
| 06 | E06 | R(-)-2,10,11-Trihydroxyaporphine hydrobromide                          | R(-)-2-Hydroxyapomorphine hydrobromide                                                                                                                                                      | 14 | E06 | (±)-Synephrine               | 4-hydroxy-alpha-(methylaminomethyl)benzyl alcohol                                                      |
| 06 | E07 | GBR-12909 dihydrochloride                                              | 1-[2-[bis(4-Fluorophenyl)methoxy]ethyl]-4-[3-phenylpropyl]piperazine dihydrochloride                                                                                                        | 14 | E07 | SC-560                       | 5-(4-Chlorophenyl)-1-(4-methoxyphenyl)-3-trifluoromethyl pyrazole                                      |
| 06 | E08 | Nefiracetam                                                            | 2-(2-Oxopyrrolidin-1-yl)-N-(2,6-dimethylphenyl)-acetamide                                                                                                                                   | 14 | E08 | SKF 75670 hydrobromide       | 7,8-dihydroxy-3-methyl-1-phenyl-2,3,4,5-tetrahydro-1H-3-benzazepine hydrobromide                       |
| 06 | E09 | 4-Diphenylacetoxy-N-(2-chloroethyl)piperidine hydrochloride            | 4-DAMP mustard hydrochloride                                                                                                                                                                | 14 | E09 | D-Serine                     | R(-)-2-Amino-3-hydroxypropionic acid                                                                   |
| 06 | E10 | Venlafaxine hydrochloride                                              | (+/-)-1-[2-(Dimethylamino)-1-(4-methoxyphenyl)ethyl]cyclohexanol hydrochloride                                                                                                              | 14 | E10 | (-)-Sulpiride                | (-)-5-Aminosulfonyl-N-[(1-ethyl-2-pyrrolidinyl)methyl]-2-methoxybenzamide                              |
| 06 | E11 | 7-Cyclopentyl-5-(4-phenoxy)phenyl-7H-pyrrolo[2,3-d]pyrimidin-4-ylamine |                                                                                                                                                                                             | 14 | E11 | Salbutamol                   | Albuterol                                                                                              |
| 06 | F02 | DL-erythro-Dihydrosphingosine                                          | DL-Sphinganine                                                                                                                                                                              | 14 | F02 | Rutaecarpine                 | Rutecarpine                                                                                            |
| 06 | F03 | DBO-83                                                                 | 3-(6-Chloro-3-pyridazinyl)-3,8-diazabicyclo[3.2.1]octane dihydrochloride                                                                                                                    | 14 | F03 | Phosphoramidon disodium      | N-(alpha-Rhamnopyranosyloxyhydroxyphosphinyl)-Leu-Trp disodium                                         |

|    |     |                                                           |                                                                                             |    |     |                                   |                                                                                                                                                                                                                                                                                    |
|----|-----|-----------------------------------------------------------|---------------------------------------------------------------------------------------------|----|-----|-----------------------------------|------------------------------------------------------------------------------------------------------------------------------------------------------------------------------------------------------------------------------------------------------------------------------------|
| 06 | F04 | N,N-Dihexyl-2-(4-fluorophenyl)indole-3-acetamide          | FGIN-1-27                                                                                   | 14 | F04 | Rauwolscline hydrochloride        | alpha-Yohimbine hydrochloride                                                                                                                                                                                                                                                      |
| 06 | F05 | L-3,4-Dihydroxyphenylalanine                              | L-DOPA; Levodopa                                                                            | 14 | F05 | Sobuzoxane                        | 4,4'-(1,2-Ethanediy)bis(1-isobutoxycarbonyloxymethyl-2,6-piperazinedione)                                                                                                                                                                                                          |
| 06 | F06 | R(-)-2,10,11-Trihydroxy-N-propylnoraporphine hydrobromide | R(-)-TNPA HBr; R(-)-2-OH-NPA hydrobromide                                                   | 14 | F06 | Sulfaphenazole                    | 4-Amino-N-(1-phenyl-1H-pyrazol-5-yl)-benzenesulfonamide                                                                                                                                                                                                                            |
| 06 | F07 | R(+)-SCH-23390 hydrochloride                              | R(+)-7-Chloro-8-hydroxy-3-methyl-1-phenyl-2,3,4,5-tetrahydro-1H-3-benzazepine hydrochloride | 14 | F07 | Semicarbazide hydrochloride       | Hydrazine carboxamide hydrochloride                                                                                                                                                                                                                                                |
| 06 | F08 | R(+)-Butylindazone                                        | R(+)-DIOA                                                                                   | 14 | F08 | SC 19220                          | 2-acetylhydrazide 10(11H)-carboxylic acid                                                                                                                                                                                                                                          |
| 06 | F09 | 1,10-Diaminodecane                                        | DA10; Decamethylenediamine                                                                  | 14 | F09 | Albuterol hemisulfate             | Salbutamol hemisulfate                                                                                                                                                                                                                                                             |
| 06 | F10 | Vanillic acid diethylamide                                | Ethamivan                                                                                   | 14 | F10 | SKF 96365                         | 1-(beta-[3-(4-Methoxyphenyl)propoxy]-4-methoxyphenethyl)-1H-imidazole hydrochloride (±) 4-Hydroxy-a1-[[[6-(4-phenylbutoxy)hexyl]amino]methyl]-1,3-benzenedimethanol xinafoate; GR 33343X xinafoate SKF 101468; 4-[2-(dipropylamino)ethyl]-1,3-dihydro-2H-indol-2-one hydrochloride |
| 06 | F11 | Emetine dihydrochloride hydrate                           |                                                                                             | 14 | F11 | Salmeterol xinafoate              | S(-)-10-Acetoxy-10,11-dihydro-5H-dibenz[b,f]azepine-5-carboxamide (1-Hydroxy-3-(methylpentylamino)propylidene)bisphosphonic acid sodium                                                                                                                                            |
| 06 | G02 | R(-)-Desmethyldeprenyl hydrochloride                      | L-Nordeprenyl hydrochloride                                                                 | 14 | G02 | Ropinirole hydrochloride          | N-(Dicyclopropylmethyl)-4,5-dihydro-2-oxazolamine; Oxaminazoline                                                                                                                                                                                                                   |
| 06 | G03 | 7,7-Dimethyl-(5Z,8Z)-eicosadienoic acid                   | DEDA                                                                                        | 14 | G03 | BIA 2-093                         | IGF-1R Inhibitor II; N-(5-Chloro-2-methoxyphenyl)-N'-(2-methylquinolin-4-yl)urea                                                                                                                                                                                                   |
| 06 | G04 | (R,R)-cis-Diethyl tetrahydro-2,8-chrysenediol             | (5R, 11R)-5,11-Diethyl-5,6,11,12-tetrahydro-2,8-chrysenediol                                | 14 | G04 | Ibandronate sodium                | Hyoscine methyl nitrate                                                                                                                                                                                                                                                            |
| 06 | G05 | Dipyridamole                                              |                                                                                             | 14 | G05 | Rilmenidine hemifumarate          | 4-(3,4-dihydroxyphenyl)-4,5,6,7-tetrahydrothieno[2,3-c]pyridine                                                                                                                                                                                                                    |
| 06 | G06 | Dipropyldopamine hydrobromide                             |                                                                                             | 14 | G06 | PQ401                             | 13-Methyl-[1,3]benzodioxolo[5,6-c]-1,3-dioxolo[4,5-i]phenanthridinium chloride                                                                                                                                                                                                     |
| 06 | G07 | (±)-DOI hydrochloride                                     | (±)-2,5-Dimethoxy-4-iodoamphetamine hydrochloride                                           | 14 | G07 | (-)-Scopolamine methyl nitrate    | Butylscopolamine bromide                                                                                                                                                                                                                                                           |
| 06 | G08 | Eliprotil                                                 | alpha-(4-Chlorophenyl)-4-[(4-fluorophenyl)methyl]-1-piperidineethanol                       | 14 | G08 | SKF 89626                         | 1,3-Dihydro-3-[(3,5-dimethyl-1H-pyrrol-2-yl)methylene]-2H-indol-2-one                                                                                                                                                                                                              |
| 06 | G09 | Dihydro-beta-erythroidine hydrobromide                    | 3beta-1,6-Didehydro-14,17-dihydro-3-methoxy-16(15H)-oxaerythrinan-15-one hydrobromide       | 14 | G09 | Sanguinarine chloride             | 5-[(1E)-2-(4-Hydroxyphenyl)ethenyl]-1,3-benzenediol                                                                                                                                                                                                                                |
| 06 | G10 | Epibestatin hydrochloride                                 | [(2R,3R)-3-Amino-2-hydroxy-4-phenylbutanoyl]-L-leucine hydrochloride                        | 14 | G10 | (-)-Scopolamine,n-Butyl-, bromide |                                                                                                                                                                                                                                                                                    |
| 06 | G11 | 5'-N-Ethylcarboxamidoadenosine                            | NECA                                                                                        | 14 | G11 | SU 5416                           |                                                                                                                                                                                                                                                                                    |
| 06 | H02 | 2,2'-Bipyridyl                                            | alpha,alpha'-Bipyridyl                                                                      | 14 | H02 | Resveratrol                       |                                                                                                                                                                                                                                                                                    |



|    |     |                                                               |                                                                                                                                                  |    |     |                                                     |                                                                                                                              |
|----|-----|---------------------------------------------------------------|--------------------------------------------------------------------------------------------------------------------------------------------------|----|-----|-----------------------------------------------------|------------------------------------------------------------------------------------------------------------------------------|
| 06 | H03 | (±) trans-U-50488<br>methanesulfonate                         | trans-(±)-3,4-Dichloro-<br>N-methyl-N-[2-(1-<br>pyrrolidinyl)-cyclohexyl]-<br>benzeneacetamide<br>methanesulfonate                               | 14 | H03 | Rotenone                                            |                                                                                                                              |
| 06 | H04 | SP600125                                                      | Anthrapyrazolone; 1,9-<br>Pyrazoloanthrone                                                                                                       | 14 | H04 | Ro 41-1049<br>hydrochloride                         | N-(2-Aminoethyl)-5-(3-<br>fluorophenyl)-4-<br>thiazolecarboxamide<br>hydrochloride                                           |
| 06 | H05 | Doxazosin mesylate                                            | 1-(4-amino-6,7-dimethoxy-2-<br>quinazolinyl)-4-[4-(1,4-<br>benzodioxan-2-<br>yl)carpiperazin-1-yl)]-6,7-<br>dimethoxyquinazoline<br>mesylate     | 14 | H05 | R(-)-Denopamine                                     | (-)-alpha-(3,4-<br>dimethoxyphenethylaminomet<br>hyl)-4-hydroxybenzylalcohol                                                 |
| 06 | H06 | AC-93253 iodide                                               | 2-[3-(1,3-Dihydro-1,3,3-<br>trimethyl-2H-indol-2-<br>ylidene)-1-propenyl]-3-ethyl-<br>benzothiazolium iodide                                     | 14 | H06 | Sulindac sulfone                                    | (Z)-5-Fluoro-2-methyl-1-[p-<br>(methylsulfonyl)benzylidene]i<br>ndene-3-acetic acid                                          |
| 06 | H07 | (±)-2,3-Dichloro-alpha-<br>methylbenzylamine<br>hydrochloride | DCMB hydrochloride; LY-<br>78335                                                                                                                 | 14 | H07 | DL-Stearoylcarnitine<br>chloride                    |                                                                                                                              |
| 06 | H08 | 3,5-Dinitrocatechol                                           | OR-486                                                                                                                                           | 14 | H08 | SKF 83565<br>hydrobromide                           | 6-chloro-1-(3-chlorophenyl)-<br>7,8-dihydroxy-3-methyl-<br>2,3,4,5-tetrahydro-1H-3-<br>benzazepine hydrobromide              |
| 06 | H09 | AL-8810                                                       | (5Z, 13E)-(9S,11S,15R)-<br>9,15,dihydroxy-11-fluoro-15-<br>(2-indanyl)-<br>16,17,18,19,20,pentanor-5,13-<br>prostadienoic acid                   | 14 | H09 | N-Succinyl-L-proline                                |                                                                                                                              |
| 06 | H10 | Etodolac                                                      | 1,8-Diethyl-1,3,4,9-<br>tetrahydropyrano[3,4-<br>b]indole-1-acetic acid                                                                          | 14 | H10 | SB 205384                                           | 4-Amino-7-hydroxy-2-methyl-<br>5,6,7,8-<br>tetrahydrobenzo[b]thieno[2,3-<br>b]pyridine-3-carboxylic acid<br>but-2-ynyl ester |
| 06 | H11 | E-64                                                          | L-trans-3-Carboxyoxiran-2-<br>carbonyl-L-leucylagmatine<br>3-[(3-Chloro-4-<br>hydroxyphenyl)amino]-4-(2-<br>nitrophenyl)-1H-pyrrol-2,5-<br>dione | 14 | H11 | (-)-Scopolamine methyl<br>bromide                   | Hyoscine methyl bromide                                                                                                      |
| 07 | A02 | SB 415286                                                     |                                                                                                                                                  | 15 | A02 | SU 4312                                             | 3-(4-<br>Dimethylaminobenzylidenyl)-<br>2-indolinone                                                                         |
| 07 | A03 | rac-2-Ethoxy-3-<br>octadecanamido-1-<br>propylphosphocholine  |                                                                                                                                                  | 15 | A03 | 1-(2-<br>Methoxyphenyl)piperazi<br>ne hydrochloride | 2-MPP hydrochloride                                                                                                          |
| 07 | A04 | (-)-Physostigmine                                             | Eserine                                                                                                                                          | 15 | A04 | Sepiapterin                                         | S(-)-2-Amino-7,8-dihydro-6-(2-<br>hydroxy-1-oxopropyl)-4(1H)-<br>pteridione                                                  |
| 07 | A05 | S(-)-Eticlopride<br>hydrochloride                             | FLB 131                                                                                                                                          | 15 | A05 | Tiapride hydrochloride                              | N-(2-[Diethylamino]ethyl)-5-<br>(methylsulfonyl)-o-anisamide<br>hydrochloride                                                |
| 07 | A06 | UCL 2077                                                      | (3-<br>Triphenylmethylaminometh<br>yl)pyridine<br>2-[4-(4-<br>Chlorobenzoyl)phenoxy]-2-<br>methylpropanoic acid 1-<br>methyl-ethyl ester         | 15 | A06 | Trihexyphenidyl<br>hydrochloride                    |                                                                                                                              |
| 07 | A07 | Fenofibrate                                                   |                                                                                                                                                  | 15 | A07 | Terbutaline hemisulfate                             | 2-t-Butylamino-1-(3,5-<br>dihydroxyphenyl)ethanol                                                                            |
| 07 | A08 | Forskolin                                                     |                                                                                                                                                  | 15 | A08 | Tyrphostin AG 1478                                  | N-(3-Chlorophenyl)-6,7-<br>dimethoxy-4-quinazolinamine                                                                       |
| 07 | A09 | Fexofenadine hydrochloride                                    | Terfenidine carboxylate,<br>MDL 16455                                                                                                            | 15 | A09 | Tyrphostin AG 528                                   | N-(3',4'-<br>Dihydroxybenzylidenecyanoa<br>cetyl)-indoline                                                                   |

|    |     |                                                    |                                                                                                                             |    |     |                                       |                                                                                                     |
|----|-----|----------------------------------------------------|-----------------------------------------------------------------------------------------------------------------------------|----|-----|---------------------------------------|-----------------------------------------------------------------------------------------------------|
| 07 | A10 | N-(3,3-Diphenylpropyl)glycinamide                  | N20C                                                                                                                        | 15 | A10 | (±)-alpha-Lipoic Acid                 | (±)-1,2-Dithiolane-3-pentanoic acid                                                                 |
| 07 | A11 | L-Canavanine                                       | L-alpha-Amino-gamma-(guanidinoxy)-n-butyric acid                                                                            | 15 | A11 | Triprolidine hydrochloride            | (E)-2-[3-(1-Pyrrolidinyl)-1-p-tolylpropenyl]pyridine hydrochloride                                  |
| 07 | B02 | S-Ethylisothiurea hydrobromide                     | 2-Ethyl-2-thiopseudourea hydrobromide                                                                                       | 15 | B02 | SR 59230A oxalate                     | 3-(2-ethylphenoxy)-1[(1S)-1,2,3,4-tetrahydronaphth-1-ylamino]-(2S)-2-propanol oxalate               |
| 07 | B03 | N-Ethylmaleimide                                   | NEM                                                                                                                         | 15 | B03 | PAPP                                  | LY-165,163; p-Aminophenethyl-m-trifluoromethylphenyl piperazine                                     |
| 07 | B04 | NBI 27914                                          | 5-Chloro-4-(N-(cyclopropyl)methyl-N-propylamino)-2-methyl-6-(2,4,6-trichlorophenyl)-aminopyridine                           | 15 | B04 | R(-)-SCH-12679 maleate                | R(-)-1-Phenyl-2,3,4,5-tetrahydro-1H-7,8-dimethoxy-3-benzazepine maleate                             |
| 07 | B05 | CCG-4986                                           | Methyl N-[(4-chlorophenyl)sulfonyl]-4-nitrobenzenesulfonimidoate                                                            | 15 | B05 | Taurine                               | 2-Aminoethanesulfonic acid                                                                          |
| 07 | B06 | Fluvoxamine maleate                                | (E)-5-Methoxy-1-[4-(trifluoromethyl)phenyl]-1-pentanone-O-(2-aminoethyl)oxime maleate                                       | 15 | B06 | Theophylline                          | 1,3-Dimethylxanthine                                                                                |
| 07 | B07 | Fenspiride hydrochloride                           | 8-(2-Phenylethyl)-1-oxa-3,8-diazaspiro[4.5]decan-2-one hydrochloride                                                        | 15 | B07 | 4-Hydroxyphenethylamine hydrochloride | Tyramine hydrochloride                                                                              |
| 07 | B08 | Famotidine                                         | N'-(Aminosulfonyl)-3-([2-(diaminomethyleneamino)-4-thiazolyl]methylthio)propanamide                                         | 15 | B08 | Tetrahydrozoline hydrochloride        |                                                                                                     |
| 07 | B09 | Formoterol                                         | (R*,R*)-N-[2-hydroxy-5-[1-hydroxy-2-[[2-(4-methoxyphenyl)-1-methylethyl]amino]ethyl]phenyl]formamide                        | 15 | B09 | Terazosin hydrochloride               | 1-(4-Amino-6,7-dimethoxy-2-quinazolinyl)-4-[(tetrahydro-2-furanyl)carbonyl]piperazine hydrochloride |
| 07 | B10 | Glybenclamide                                      | Glyburide                                                                                                                   | 15 | B10 | DL-Thiorphan                          | DL-3-Mercapto-2-benzylpropanoylglycine                                                              |
| 07 | B11 | GW1929                                             | N-(2-Benzoylphenyl)-O-[2-(methyl-2-pyridinylamino)ethyl]-L-tyrosine;N-(2-Benzoylphenyl)-L-tyrosine                          | 15 | B11 | Tyrphostin AG 112                     | 3-Amino-2,4-dicyano-5-(4'-hydroxyphenyl)-penta-2,4-dienonitrile                                     |
| 07 | C02 | Epinastine hydrochloride                           | 9,13b-Dihydro-1H-dibenz[cf]imidazo[1,5-a]azepine hydrochloride                                                              | 15 | C02 | BRL 52537 hydrochloride               | (+/-)-1-(3,4-Dichlorophenyl)acetyl-2-(1-pyrrolidinyl)methylpiperidine hydrochloride                 |
| 07 | C03 | (-)-Epinephrine bitartrate                         | Adrenaline bitartrate                                                                                                       | 15 | C03 | Spiroxatrine                          | R 5188                                                                                              |
| 07 | C04 | beta-Estradiol                                     | Dihydrofolliculin                                                                                                           | 15 | C04 | (±)-SKF 38393, N-allyl-, hydrobromide | (±)-7,8-Dihydroxy-3-allyl-1-phenyl-2,3,4,5-tetrahydro-1H-3-benzazepine hydrobromide                 |
| 07 | C05 | erythro-9-(2-Hydroxy-3-nonyl)adenine hydrochloride | EHNA hydrochloride                                                                                                          | 15 | C05 | Thiothixene hydrochloride             | SKF-5019 hydrochloride                                                                              |
| 07 | C06 | Picropodophyllotoxin                               | (5R,5aS,8aR,9R)-9-Hydroxy-5,8,8a,9-tetrahydro-5-(3,4,5-trimethoxyphenyl)furo[3',4':6,7]naphtho[2,3-d]-1,3-dioxol-6(5aH)-one | 15 | C06 | (E)-4-amino-2-butenic acid            | TACA                                                                                                |

|    |     |                               |                                                                                                                                                                                        |    |     |                                               |                                                                                                     |
|----|-----|-------------------------------|----------------------------------------------------------------------------------------------------------------------------------------------------------------------------------------|----|-----|-----------------------------------------------|-----------------------------------------------------------------------------------------------------|
| 07 | C07 | Flumazenil                    | Ro 15-1788                                                                                                                                                                             | 15 | C07 | Triflupromazine hydrochloride                 |                                                                                                     |
| 07 | C08 | FSCPX                         | 8-Cyclopentyl-N3-[3-(4-(fluorosulfonyl)benzoyloxy)propyl]-N1-propylxanthine                                                                                                            | 15 | C08 | Tyrphostin AG 494                             | N-Phenyl-3,4-dihydroxybenzylidenecyanoacetamide                                                     |
| 07 | C09 | Felodipine                    | Plendil                                                                                                                                                                                | 15 | C09 | Tyrphostin AG 537                             | Bis-Tyrphostin                                                                                      |
| 07 | C10 | GW2974                        | N4-(1-Benzyl-1H-indazol-5-yl)-N6,N6-dimethyl-pyrido[3,4-d]pyrimidine-4,6-diamine                                                                                                       | 15 | C10 | Tulobuterol hydrochloride                     |                                                                                                     |
| 07 | C11 | GW5074                        | 3-(3, 5-Dibromo-4-hydroxybenzylidene-5-iodo-1,3-dihydro-indol-2-one)                                                                                                                   | 15 | C11 | Tyrphostin 1                                  | (4-Methoxybenzylidene)malononitrile                                                                 |
| 07 | D02 | Edrophonium chloride          | Ethyl(m-hydroxyphenyl)dimethylammonium chloride                                                                                                                                        | 15 | D02 | SKF 89976A hydrochloride                      | 1-(4,4-Diphenyl-3-butenyl)-3-piperidinecarboxylic acid hydrochloride                                |
| 07 | D03 | EGTA                          | Ethylene glycol-bis(2-aminoethylether)-N,N,N',N'-tetraacetic acid; Egtazic acid                                                                                                        | 15 | D03 | SR-95531                                      | 2-(3-Carboxypropyl)-3-amino-6-(4-methoxyphenyl)pyridazinium bromide                                 |
| 07 | D04 | Estrone                       | Folliculin                                                                                                                                                                             | 15 | D04 | SDZ-205,557 hydrochloride                     | 4-Amino-5-chloro-2-methoxybenzoic acid 2-(diethylamino)ethyl ester hydrochloride                    |
| 07 | D05 | Alinidine                     | N-(2,6-Dichlorophenyl)-4,5-dihydro-N-2-propenyl-1H-imidazol-2-amine                                                                                                                    | 15 | D05 | Tolbutamide                                   |                                                                                                     |
| 07 | D06 | Furegrelate sodium            | 5-(3-Pyridinylmethyl)benzofuran carboxylic acid sodium                                                                                                                                 | 15 | D06 | Tetradecylthioacetic acid                     | TTA                                                                                                 |
| 07 | D07 | Foliosidine                   |                                                                                                                                                                                        | 15 | D07 | Trimipramine maleate                          |                                                                                                     |
| 07 | D08 | NS8593 hydrochloride          | N-[(1R)-1,2,3,4-Tetrahydro-1-naphthalenyl]-1H-benzimidazol-2-amine hydrochloride                                                                                                       | 15 | D08 | N-p-Tosyl-L-phenylalanine chloromethyl ketone | TPCK                                                                                                |
| 07 | D09 | Fluspirilene                  | R 6218                                                                                                                                                                                 | 15 | D09 | Tyrphostin AG 555                             | Tyrphostin B46                                                                                      |
| 07 | D10 | Guanfacine hydrochloride      | N-(aminoiminomethyl)-2,6-dichloro-benzeneacetamide hydrochloride                                                                                                                       | 15 | D10 | Trazodone hydrochloride                       | 2-[3-[4-(3-Chlorophenyl)-1-piperazinyl]propyl]-1,2,4-triazolo[4,3-a]pyridin-3(2H)-one hydrochloride |
| 07 | D11 | Genistein                     | 5,7-Dihydroxy-3-(4-hydroxyphenyl)-4H-1-benzopyran-4-one                                                                                                                                | 15 | D11 | Tyrphostin 23                                 | (Dihydroxybenzylidene)malononitrile                                                                 |
| 07 | E02 | Efaroxan hydrochloride        | RX 821037A                                                                                                                                                                             | 15 | E02 | SIB 1757                                      | 6-Methyl-2-(phenylazo)-3-pyridinol                                                                  |
| 07 | E03 | (±)-Epinephrine hydrochloride | (±)-Adrenalin hydrochloride                                                                                                                                                            | 15 | E03 | (±)-6-Chloro-PB hydrobromide                  | (±)-SKF-81297 hydrobromide                                                                          |
| 07 | E04 | Phenserine                    | (-)-N-Phenylcarbamoylseroline                                                                                                                                                          | 15 | E04 | SB 206553 hydrochloride                       | N-3-Pyridinyl-3,5-dihydro-5-methyl-benzo[1,2-b:4,5-b']dipyrrole-1(2H)-carboxamide hydrochloride     |
| 07 | E05 | Felbamate                     | 2-Phenyl-1,3-propanediol dicarbamate                                                                                                                                                   | 15 | E05 | Tetraethylthiuram disulfide                   | Disulfiram                                                                                          |
| 07 | E06 | Fiduxosin hydrochloride       | (3-[4-((3αR,9βR)-cis-9-methoxy-1,2,3,3a,4,9b-hexahydro-[1]-benzopyrano[3,4-c]pyrrol-2-yl)butyl]-8-phenyl-pyrazino-[2',3':4,5]thi-eno [3,2-d]pyrimidine-2,4(1H,3H)-dione) hydrochloride | 15 | E06 | Trequinsin hydrochloride                      | HL 725                                                                                              |
| 07 | E07 | Fusaric acid                  | 5-Butyl-2-pyridinecarboxylic acid                                                                                                                                                      | 15 | E07 | Tyrphostin AG 490                             | 2-propenamide                                                                                       |

|    |     |                                       |                                                                                                     |    |     |                                                       |                                                                                                                                                |
|----|-----|---------------------------------------|-----------------------------------------------------------------------------------------------------|----|-----|-------------------------------------------------------|------------------------------------------------------------------------------------------------------------------------------------------------|
| 07 | E08 | Flunarizine dihydrochloride           | 1-[bis(4-fluorophenyl)methyl]-4-(3-phenyl-2-propenyl)-piperazine dihydrochloride                    | 15 | E08 | (6R)-5,6,7,8-Tetrahydro-L-biopterin hydrochloride     |                                                                                                                                                |
| 07 | E09 | cis-(Z)-Flupenthixol dihydrochloride  | (Z)-4-[3-[2-(Trifluoromethyl)-9H-thioxanthen-9-ylidene]propyl]-1-piperazine-ethanol dihydrochloride | 15 | E09 | Tyrphostin AG 698                                     | Tyrphostin B52                                                                                                                                 |
| 07 | E10 | L-Glutamic acid hydrochloride         | S(+)-1-Aminopropane-1,3-dicarboxylic acid hydrochloride                                             | 15 | E10 | Tyrphostin AG 34                                      | Tyrphostin A24                                                                                                                                 |
| 07 | E11 | GW7647                                | 2-(4-(2-(1-Cyclohexanebutyl)-3-cyclohexylureido)ethyl)phenylthio)-2-methylpropionic acid            | 15 | E11 | Pifithrin-mu                                          | PFTmu; 2-Phenylethynesulfonamide                                                                                                               |
| 07 | F02 | Ellipticine                           | 5,11-Dimethyl-6H-pyrido[4,3-b]carbazole                                                             | 15 | F02 | SIB 1893                                              | (E)-2-Methyl-6-[2-phenylethenyl]pyridine                                                                                                       |
| 07 | F03 | Ethosuximide                          | 2-Ethyl-2-methylsuccinimide                                                                         | 15 | F03 | L-Beta-threo-benzyl-aspartate                         | (2S,3S)-2-Amino-3-benzylsuccinic acid                                                                                                          |
| 07 | F04 | N-Methyl-beta-carboline-3-carboxamide | FG-7142                                                                                             | 15 | F04 | SB 224289 hydrochloride                               | 1'-Methyl-5-([2'-methyl-4'-(5-methyl-1,2,4-oxadiazol-3-yl)biphenyl-4-yl] carbonyl)-2,3,6,7-tetrahydro-spiro[furo[2,3-f]indole-3,4'-piperidine] |
| 07 | F05 | Fusidic acid sodium                   | Fusidin                                                                                             | 15 | F05 | TCPOBOP                                               | 1,4-Bis-[2-(3,5-dichloropyridyloxy)]benzene                                                                                                    |
| 07 | F06 | Furosemide                            |                                                                                                     | 15 | F06 | Tyrphostin AG 879                                     | alpha-cyano-(3,5-di-t-butyl-4-hydroxy)thiocinnamide                                                                                            |
| 07 | F07 | 5-Fluorouracil                        | 5-FU                                                                                                | 15 | F07 | TTNPB                                                 | Arotinoid acid                                                                                                                                 |
| 07 | F08 | 5-fluoro-5'-deoxyuridine              | 5'dFUrd                                                                                             | 15 | F08 | Tyrphostin AG 527                                     | Tyrphostin B44                                                                                                                                 |
| 07 | F09 | Furafylline                           | 3-(2-Furanylmethyl)-3,7-dihydro-1,8-dimethyl-1H-purine-2,6-dione                                    | 15 | F09 | Tyrphostin AG 808                                     | 2-Cyano-3-(3',4'-dihydroxyphenyl)-1-(3"-indolyl)-3-oxo-1-propene                                                                               |
| 07 | F10 | Ganciclovir                           |                                                                                                     | 15 | F10 | Triamcinolone                                         | Fluoxyprednisolone                                                                                                                             |
| 07 | F11 | alpha-Guanidinoglutaric acid          | GGA                                                                                                 | 15 | F11 | Na-p-Tosyl-L-lysine chloromethyl ketone hydrochloride | TLCK hydrochloride                                                                                                                             |
| 07 | G02 | Ebselen                               | 2-Phenyl-1,2-benzisoselenazol-3(2H)-one                                                             | 15 | G02 | Naphthyl)piperazine hydrochloride                     |                                                                                                                                                |
| 07 | G03 | JX401                                 | 1-[2-Methoxy-4-(methylthio)benzoyl]-4-benzylpiperidine                                              | 15 | G03 | Suramin sodium salt                                   |                                                                                                                                                |
| 07 | G04 | DPO-1                                 | Diphenyl phosphine oxide-1                                                                          | 15 | G04 | L-Tryptophan                                          | S(-)-1-alpha-Aminoindole-3-propionic acid                                                                                                      |
| 07 | G05 | Fenoterol hydrobromide                | 2-(3,5-Dihydroxyphenyl)-2-hydroxy-2'-(4-hydroxyphenyl)-1'-methyldiethylamine hydrobromide           | 15 | G05 | Tetraisopropyl pyrophosphoramide                      | iso-OMPA                                                                                                                                       |
| 07 | G06 | p-Fluoro-L-phenylalanine              | 4-Fluoro-L-phenylalanine                                                                            | 15 | G06 | Tetraethylammonium chloride                           |                                                                                                                                                |
| 07 | G07 | Flecainide acetate                    | N-(2-Piperidylmethyl)-2,5-bis-(2,2,2-trifluoroethoxy)benzamide acetate                              | 15 | G07 | L-765,314                                             | (2S)-4-(4-Amino-6,7-dimethoxy-2-quinazolinyl)-2-[[[(1,1-Dimethylethyl)amino]carbonyl]-1-piperazinecarboxylic acid, phenylmethyl ester          |

|    |     |                                                      |                                                                                               |    |     |                                                                |                                                                                                                    |
|----|-----|------------------------------------------------------|-----------------------------------------------------------------------------------------------|----|-----|----------------------------------------------------------------|--------------------------------------------------------------------------------------------------------------------|
| 07 | G08 | Flupirtine maleate                                   | 2-amino-6-[[[4-fluorophenyl)methyl]amino]-3-pyridinyl]-carbamic acid, ethyl ester maleate     | 15 | G08 | Theobromine                                                    | 3,7-Dimethylxanthine                                                                                               |
| 07 | G09 | FPL 64176                                            | 2,5-Dimethyl-4-[2-(phenylmethyl)benzoyl]-1H-pyrrole-3-carboxylic acid methyl ester            | 15 | G09 | Thio-NADP sodium                                               | Thionicotinamide adenine dinucleotide phosphate sodium                                                             |
| 07 | G10 | L-Glutamine                                          | S(+)-Glutamic acid 5-amide                                                                    | 15 | G10 | S(-)-Timolol maleate                                           | (S)-1-[(1,1-Dimethylethyl)amino]-3-[[4-(4-morpholinyl)-1,2,5-thiadiazol-3-yl]oxy]-2-propanol maleate               |
| 07 | G11 | Gallamine triethiodide                               |                                                                                               | 15 | G11 | Tyrphostin 25                                                  | (4,5-Trihydroxybenzylidene)malononitrile                                                                           |
| 07 | H02 | rac-2-Ethoxy-3-hexadecanamido-1-propylphosphocholine |                                                                                               | 15 | H02 | Ketanserin tartrate                                            | R 41468                                                                                                            |
| 07 | H03 | Emodin                                               |                                                                                               | 15 | H03 | SQ 22536                                                       | 9-(Tetrahydro-2-furanyl)-9H-purin-6-amine                                                                          |
| 07 | H04 | (-)-Eseroline fumarate                               |                                                                                               | 15 | H04 | Tranilast                                                      | SB-252218                                                                                                          |
| 07 | H05 | S-(+)-Fluoxetine hydrochloride                       |                                                                                               | 15 | H05 | Tetramisole hydrochloride                                      | (±)-2,3,5,6-Tetrahydro-6-phenylimidazo[2,1-b]thiazole hydrochloride                                                |
| 07 | H06 | Fluphenazine dihydrochloride                         |                                                                                               | 15 | H06 | Tolazamide                                                     |                                                                                                                    |
| 07 | H07 | Fenoldopam bromide                                   | SKF-82526                                                                                     | 15 | H07 | Triamterene                                                    |                                                                                                                    |
| 07 | H08 | Flutamide                                            | 2-Methyl-N-(4-nitro-3-[trifluoromethyl]phenyl)propanamide                                     | 15 | H08 | (±)-Taxifolin                                                  | Dihydroquercetin                                                                                                   |
| 07 | H09 | Fluoxetine hydrochloride                             | Prozac; LY-110,140 hydrochloride                                                              | 15 | H09 | Tyrphostin AG 835                                              | Tyrphostin B50                                                                                                     |
| 07 | H10 | Guanidinylnaltrindole di-trifluoroacetate            | GNTI di-trifluoroacetate                                                                      | 15 | H10 | N,N,N-trimethyl-1-(4-trans-stilbenoxy)-2-propylammonium iodide | F3                                                                                                                 |
| 07 | H11 | GBR-12935 dihydrochloride                            | 1-[2-(Diphenylmethoxy)ethyl]-4-(3-phenylpropyl)-piperazine dihydrochloride                    | 15 | H11 | 1-[2-(Trifluoromethyl)phenyl]imidazole                         | TRIM                                                                                                               |
| 08 | A02 | Isoguvacine hydrochloride                            | 1,2,3,6-Tetrahydro-4-pyridinecarboxylic acid hydrochloride                                    | 16 | A02 | Taxol                                                          | Paclitaxel                                                                                                         |
| 08 | A03 | GYKI 52895                                           | 1-(4-Aminophenyl)-4-methyl-7,8-methylenedioxy-3,4-dihydro-5H-2,3-benzodiazepine hydrochloride | 16 | A03 | Tomoxetine                                                     | (R)-N-methyl-gamma-(2-methylphenoxy)-benzenepropanamine                                                            |
| 08 | A04 | MHPG piperazine                                      | MOPEG piperazine                                                                              | 16 | A04 | Tamoxifen citrate                                              | (Z)-2-[4-(1,2-Diphenyl-1-butenyl)phenoxy]-N,N-dimethyl-ethanamine citrate (1:1)                                    |
| 08 | A05 | DL-threo-beta-hydroxyaspartic acid                   | threo-2-Amino-3-hydroxysuccinic acid                                                          | 16 | A05 | Telenzepine dihydrochloride                                    | 4,9-Dihydro-3-methyl-4-[(4-methyl-1-piperazinyl)acetyl]-10H-thieno[3,4-b][1,5]benzodiazepin-10-one dihydrochloride |
| 08 | A06 | 17alpha-hydroxyprogesterone                          | 17alpha-Hydroxy-4-pregnene-3,20-dione                                                         | 16 | A06 | Uridine 5'-diphosphate sodium                                  | UDP                                                                                                                |

|    |     |                                                  |                                                                                                           |    |     |                          |                                                                                                                                                                      |
|----|-----|--------------------------------------------------|-----------------------------------------------------------------------------------------------------------|----|-----|--------------------------|----------------------------------------------------------------------------------------------------------------------------------------------------------------------|
| 08 | A07 | L-Histidine hydrochloride                        | S(+)-alpha-Amino-1H-imidazole-4-propanoic acid hydrochloride                                              | 16 | A07 | U-69593                  | (+)-(5alpha,7alpha,8beta)-N-Methyl-N-[7-(1-pyrrolidinyl)-1-oxaspiro[4.5]dec-8-yl]-benzeneacetamide                                                                   |
| 08 | A08 | L-Hyoscyamine                                    | [3(S)-endo]-alpha-(Hydroxymethyl)benzeneacetic acid 8-methyl-8-azabicyclo[3.2.1]oct-3-yl ester            | 16 | A08 | U-99194A maleate         | 5,6-Dimethoxy-2-(di-n-propylamino)indan maleate                                                                                                                      |
| 08 | A09 | 4-Hydroxybenzhydrazide                           | 4-Hydroxybenzoylhydrazine                                                                                 | 16 | A09 | Vincristine sulfate      | VCR                                                                                                                                                                  |
| 08 | A10 | R-(+)-7-Hydroxy-DPAT hydrobromide                | R(+)-7-Hydroxy-dipropylaminotetralin hydrobromide                                                         | 16 | A10 | WIN 62,577               | 17-beta-Hydroxy-17-alpha-ethynyl-delta-4-androstano(3,2-b)pyrimido(1,2-a)benzimidazole                                                                               |
| 08 | A11 | Iodoacetamide                                    |                                                                                                           | 16 | A11 | Yohimbine hydrochloride  | 17-Hydroxyyohimban-16-carboxylic acid methyl ester hydrochloride                                                                                                     |
| 08 | B02 | Guvacine hydrochloride                           |                                                                                                           | 16 | B02 | Tetracaine hydrochloride |                                                                                                                                                                      |
| 08 | B03 | GR-89696 fumarate                                | 4-[(3,4-Dichlorophenyl)acetyl]-3-(1-pyrrolidinylmethyl)-1-piperazinecarboxylic acid methyl ester fumarate | 16 | B03 | T-0156                   | 2-(2-Methylpyridin-4-yl)methyl-4-(3,4,5-trimethoxyphenyl)-8-(pyrimidin-2-yl)methoxy-1,2-dihydro-1-oxo-2,7-naphthyridine-3-carboxylic acid methyl ester hydrochloride |
| 08 | B04 | Hypotaaurine                                     | 2-Aminoethanesulfinic acid                                                                                | 16 | B04 | Terfenadine              | alpha-(4-[1,1-Dimethylethyl]phenyl)-4-[hydroxydiphenylmethyl]-1-piperidinebutanol                                                                                    |
| 08 | B05 | Ciproxifan hydrochloride                         | Cyclopropyl[4-[3-(1H-imidazol-4-yl)propoxyl]phenyl]-methanone hydrochloride                               | 16 | B05 | Thiopramide maleate      | MR 12842                                                                                                                                                             |
| 08 | B06 | 1,3,5-tris(4-hydroxyphenyl)-4-propyl-1H-pyrazole | PPT                                                                                                       | 16 | B06 | U-74389G maleate         | 21-(4-[2,6-di-1-Pyrrolidinyl-4-pyrimidinyl]-1-piperazinyl)pregna-1,4,9[11]-triene-3,20-dione (Z)-2-butenedioate maleate                                              |
| 08 | B07 | (±)-8-Hydroxy-DPAT hydrobromide                  | (±)-8-Hydroxy-dipropylaminotetralin hydrobromide                                                          | 16 | B07 | UK 14,304                | 5-Bromo-N-(4,5-dihydro-1H-imidazol-2-yl)-6-quinoxalinamine                                                                                                           |
| 08 | B08 | Hydroquinone                                     | 1,4-Benzenediol                                                                                           | 16 | B08 | U0126                    | 1,4-Diamino-2,3-dicyano-1,4-bis(o-aminophenylmercapto)butadiene                                                                                                      |
| 08 | B09 | Hemicholinium-3                                  |                                                                                                           | 16 | B09 | AMG 9810                 | 2E-N-(2,3-Dihydro-1,4-benzodioxin-6-yl)-3-[4-(1,1-dimethylethyl)phenyl]-2-Propenamide                                                                                |
| 08 | B10 | GR 125487 sulfamate salt                         | [1-[2-[(Methylsulfonyl)amino]ethyl]-4-piperidinyl]methyl-5-fluoro-2-methoxy-1H-indole-3-carboxylate       | 16 | B10 | S(-)-Willardiine         | S(-)-alpha-Amino-3,4-dihydro-2,4-dioxo-1(2H)-pyrimidinepropanoic acid                                                                                                |
| 08 | B11 | HA-100                                           | 1-(5-Isoquinolinesulfonyl)piperazine hydrochloride                                                        | 16 | B11 | YS-035 hydrochloride     | N-[2-(3,4-Dimethoxyphenyl)ethyl]-3,4-dimethoxy-N-methylbenzeneethanamine hydrochloride                                                                               |

|    |     |                                      |                                                                                |    |     |                                 |                                                                                             |
|----|-----|--------------------------------------|--------------------------------------------------------------------------------|----|-----|---------------------------------|---------------------------------------------------------------------------------------------|
| 08 | C02 | (±)-AMPA hydrobromide                | (±)-alpha-Amino-3-hydroxy-5-methylisoxazole-4-propionic acid hydrobromide      | 16 | C02 | Tyrphostin 47                   | RG 50864                                                                                    |
| 08 | C03 | Gabapentin                           | 1-(Aminomethyl)-cyclohexaneacetic acid                                         | 16 | C03 | 3-Tropanyl-3,5-dichlorobenzoate | MDL-72222                                                                                   |
| 08 | C04 | Haloperidol                          |                                                                                | 16 | C04 | Tropicamide                     | Ro 1-7683                                                                                   |
| 08 | C05 | Hydroxytacrine maleate               | HP-029                                                                         | 16 | C05 | (±)-Thalidomide                 | (±)-2-(2,6-Dioxo-3-piperidinyl)-1H-isoindole-1,3(2H)-dione                                  |
| 08 | C06 | 1-(4-Hydroxybenzyl)imidazole-2-thiol |                                                                                | 16 | C06 | Imiquimod                       | 1-(2-Methylpropyl)-1H-imidazole[4,5-c]quinoline-4-amine                                     |
| 08 | C07 | Dopamine hydrochloride               | 3-Hydroxytyramine hydrochloride                                                | 16 | C07 | U-62066                         | Spiradoline mesylate                                                                        |
| 08 | C08 | BU99006                              | 2-(Imidazolin-2-yl)-5-isothiocyanatobenzofuran                                 | 16 | C08 | Vinblastine sulfate salt        | VLB                                                                                         |
| 08 | C09 | HA-1004 hydrochloride                | N-(2-Guanidinoethyl)-5-isoquinolinesulfonamide hydrochloride                   | 16 | C09 | (±)-Vesamicol hydrochloride     | AH-5183 hydrochloride                                                                       |
| 08 | C10 | IEM-1460                             | 1-Trimethylammonio-5-(1-adamantanemethylammonio)pentane dibromide              | 16 | C10 | WAY-100635 maleate              | N-[2-[4-(2-Methoxyphenyl)-1-piperazinyl]ethyl]-N-2-pyridinyl-cyclohexanecarboxamide maleate |
| 08 | C11 | Ipratropium bromide                  | Atropine isopropyl bromide                                                     | 16 | C11 | YC-1                            | 3-(5'-Hydroxymethyl-2'-furyl)-1-benzyl indazole                                             |
| 08 | D02 | Muscimol hydrobromide                | 3-Hydroxy-5-aminomethylisoxazole hydrobromide                                  | 16 | D02 | Tyrphostin 51                   | 2-Amino-1,1,3-tricyano-4-(3',4',5'-trihydroxyphenyl)butadiene                               |
| 08 | D03 | DL-Homatropine hydrobromide          | Tropine mandelate hydrobromide                                                 | 16 | D03 | Trifluoperazine dihydrochloride |                                                                                             |
| 08 | D04 | Hydralazine hydrochloride            | 1-Hydrazinophthalazine hydrochloride                                           | 16 | D04 | THIP hydrochloride              | Gaboxadol hydrochloride                                                                     |
| 08 | D05 | Hydrocortisone                       | Cortisol                                                                       | 16 | D05 | R(+)-Terguride                  | R(+)-N,N-Diethyl-N'[(8alpha)-6-methylergolin-8-yl]urea                                      |
| 08 | D06 | Histamine dihydrochloride            | 1H-Imidazole-4-ethanamine dihydrochloride                                      | 16 | D06 | U-73122                         | 1-[6-[[[(17beta)-3-Methoxyestra-1,3,5(10)-trien-17-yl]amino]hexyl]-1H-pyrrole-2,5-dione     |
| 08 | D07 | Hydroxyurea                          |                                                                                | 16 | D07 | S(-)-UH-301 hydrochloride       | S(-)-5-Fluoro-8-hydroxy-DPAT hydrochloride                                                  |
| 08 | D08 | MNS                                  | 3,4-Methylenedioxy-beta-nitrostyrene                                           | 16 | D08 | (±)-Verapamil hydrochloride     |                                                                                             |
| 08 | D09 | N-Methylhistaprodifen dioxalate salt | N-Methyl-2-[2-(3,3-diphenylpropyl)-1H-imidazol-4-yl]-ethanamine dioxalate salt | 16 | D09 | XK469                           | 2-(4-((7-Chloro-2-quinoxalinyloxy)phenoxy)propionic acid                                    |
| 08 | D10 | Ibudilast                            | KC-404                                                                         | 16 | D10 | AC-55649                        | 4'-Octyl-4-biphenylcarboxylic acid, 4'-n-octylbiphenyl-4-carboxylic acid; 8BCA              |
| 08 | D11 | Idarubicin                           | Idamycin                                                                       | 16 | D11 | Zaprinast                       | 1,4-Dihydro-5-(2-propoxyphenyl)-7H-1,2,3-triazolo[4,5-d]pyrimidin-7-one                     |
| 08 | E02 | Guanabenz acetate                    | WY-8678                                                                        | 16 | E02 | PAC-1                           | (4-Benzylpiperazino)acetic acid (3-allyl-2-hydroxybenzylidene)hydrazide                     |
| 08 | E03 | (±)-Vanillylmandelic acid            | (±)-4-Hydroxy-3-methoxymandelic acid                                           | 16 | E03 | D-609 potassium                 | Carbonodithioic acid, O-(octahydro-4,7-methano-1H-inden-5-yl) ester potassium               |

|    |     |                                                         |                                                                                                           |    |     |                                               |                                                                                                            |
|----|-----|---------------------------------------------------------|-----------------------------------------------------------------------------------------------------------|----|-----|-----------------------------------------------|------------------------------------------------------------------------------------------------------------|
| 08 | E04 | 4-Imidazolemethanol hydrochloride                       | 4-(Hydroxymethyl)imidazole hydrochloride                                                                  | 16 | E04 | Trifluperidol hydrochloride                   | R 2498 hydrochloride; Triperidol hydrochloride                                                             |
| 08 | E05 | Lithium Chloride                                        |                                                                                                           | 16 | E05 | Thio-L-citrulline                             | N5-(Aminothioxomethyl)-L-ornithine                                                                         |
| 08 | E06 | Harmane                                                 | Aribine                                                                                                   | 16 | E06 | SKF 95282 dimaleate                           | N-[3-[3-(1-Piperidinylmethyl)phenoxy]propyl]-2-benzothiazolamine dimaleate; Zolantidine                    |
| 08 | E07 | (+)-Hydrastine                                          | (+)-beta-Hydrastine 1(S),9(R)                                                                             | 16 | E07 | R(+)-UH-301 hydrochloride                     | R(+)-5-Fluoro-8-hydroxy-DPAT hydrochloride                                                                 |
| 08 | E08 | Serotonin hydrochloride                                 | 5-HT hydrochloride                                                                                        | 16 | E08 | VUF 5574                                      | N-(2-methoxyphenyl)-N'-[2-(3-pyridinyl)-4-quinazolinyl]-urea                                               |
| 08 | E09 | Hexahydro-sila-difenidol hydrochloride, p-fluoro analog | p-F-HHSiD hydrochloride                                                                                   | 16 | E09 | Wortmannin from Penicillium funiculosum       |                                                                                                            |
| 08 | E10 | Imidazole-4-acetic acid hydrochloride                   | I4AA                                                                                                      | 16 | E10 | Xylazine hydrochloride                        | N-(2,6-Dimethylphenyl)-5,6-dihydro-4H-1,3-thiazin-2-amine hydrochloride                                    |
| 08 | E11 | Metolazone                                              | 7-Chloro-1,2,3,4-tetrahydro-2-methyl-3-(2-methylphenyl)-4-oxo-6-quinazolinesulfonamide                    | 16 | E11 | Zonisamide sodium                             | 1,2-Benzisoxazole-3-methanesulfonamide                                                                     |
| 08 | F02 | gamma-D-Glutamylaminomethylsulfonic acid                | GAMS                                                                                                      | 16 | F02 | 1-OMe-Tyrphostin AG 538                       | alpha-Cyano-(3-methoxy-4-hydroxy-5-iodocinnamoyl)-(3',4'-dihydroxyphenyl)ketone                            |
| 08 | F03 | 6-Hydroxymelatonin                                      | 3-(N-Acetylaminoethyl)-6-hydroxy-5-methoxyindole N,N,N,N',N',N'-Hexamethyl-1,6-hexanediaminium dichloride | 16 | F03 | Thioridazine hydrochloride                    |                                                                                                            |
| 08 | F04 | Hexamethonium dichloride                                | 6-Chloro-3,4-dihydro-2H-1,2,4-benzothiadiazine-7-sulfonamide 1,1-dioxide                                  | 16 | F04 | 3-Tropanyl-indole-3-carboxylate hydrochloride | ICS-205,930; Navoban; Tropisetron                                                                          |
| 08 | F05 | Hydrochlorothiazide                                     |                                                                                                           | 16 | F05 | Tyrphostin A9                                 | [[3,5-bis(1,1-Dimethylethyl)-4-hydroxyphenyl]methylene]-propanedinitrile                                   |
| 08 | F06 | NG-Hydroxy-L-arginine acetate                           | NOHA acetate                                                                                              | 16 | F06 | 4-Imidazoleacrylic acid                       | Urocanic acid                                                                                              |
| 08 | F07 | (±)-7-Hydroxy-DPAT hydrobromide                         | (±)-7-OH-DPAT HBr; (±)-Hydroxy-dipropylaminotetralin hydrobromide                                         | 16 | F07 | CGP 57380                                     | N3-(4-fluorophenyl)-1h-pyrazolo[3,4-d]pyrimidine-3,4-diamine                                               |
| 08 | F08 | L-165,041                                               | 4-[3-(4-Acetyl-3-hydroxy-2-propylphenoxy)propoxy]phenoxycetic acid                                        | 16 | F08 | Vinpocetine                                   | Eburnamenine-14-carboxylic acid ethyl ester; (3alpha, 16alpha)-Eburnamenine-14-carboxylic acid ethyl ester |
| 08 | F09 | Histamine, R(-)-alpha-methyl-, dihydrochloride          | R(-)-alpha-Methylhistamine dihydrochloride                                                                | 16 | F09 | 1400W dihydrochloride                         |                                                                                                            |
| 08 | F10 | CPNQ                                                    | 5-[4-(4-Chlorobenzoyl)-1-piperazinyl]-8-nitroquinoline                                                    | 16 | F10 | Xamoterol hemifumarate                        | ICI 118587; (+/-)-N-[2-[[Hydroxy-3-(4-hydroxy)propyl]amino]ethyl-4-morpholinecarboxamide hemifumarate      |
| 08 | F11 | SB 228357                                               | N-[3-Fluoro-5-(3-pyridinyl)phenyl]-2,3-dihydro-5-methoxy-6-(trifluoromethyl)-1H-indole-1-carboxamide      | 16 | F11 | Zardaverine                                   | 6-(4-Difluoromethoxy-3-methoxyphenyl)-3(2H)-pyridazinone                                                   |
| 08 | G02 | Glipizide                                               |                                                                                                           | 16 | G02 | Tyrphostin AG 538                             | (alphaE)-alpha-[(3,4-Dihydroxyphenyl)methylene]-3,4-dihydroxy-beta-oxo-benzenepropanenitrile               |



|    |     |                                      |                                                                                   |    |     |                                                       |                                                                                                                         |
|----|-----|--------------------------------------|-----------------------------------------------------------------------------------|----|-----|-------------------------------------------------------|-------------------------------------------------------------------------------------------------------------------------|
| 08 | G03 | Hexamethonium bromide                | Hexane-1,6-bis(trimethylammonium bromide)                                         | 16 | G03 | Thapsigargin                                          |                                                                                                                         |
| 08 | G04 | CCG-2046                             | 3-Methyl-3-propyl-cyclopropane-1,1,2,2-tetracarbonitrile                          | 16 | G04 | XCT790                                                | -[4-(2,4-Bis-trifluoromethylbenzyloxy)-3-methoxyphenyl]-2-cyano-N-(5-trifluoromethyl-1,3,4-thiadiazol-2-yl)acrylamide   |
| 08 | G05 | SB 218795                            | (-)-(R)-N-(alpha-methoxycarbonylbenzyl)-2-phenylquinoline-4-carboxamide           | 16 | G05 | TPMPA                                                 | (1,2,5,6-Tetrahydropyridine-4-yl)methylphosphinic acid                                                                  |
| 08 | G06 | Retinoic acid p-hydroxyanilide       | N-(4-Hydroxyphenyl)retinamide                                                     | 16 | G06 | Urapidil hydrochloride                                | 6[[3-[4-(o-Methoxyphenyl)-1-piperazinyl]propyl]amino]-1,3-dimethyluracil hydrochloride                                  |
| 08 | G07 | MHPG sulfate potassium               | 4-Hydroxy-3-methoxyphenylglycol-4-sulfate potassium                               | 16 | G07 | (-)-trans-(1S,2S)-U-50488 hydrochloride               | trans-(1S,2S)-3,4-Dichloro-N-methyl-N-(2-[1-pyrrolidinyl]cyclohexyl)benzeneacetamide hydrochloride                      |
| 08 | G08 | 5-Hydroxy-L-tryptophan               | S(+)-1-alpha-Amino-5-hydroxyindole-3-propionic acid                               | 16 | G08 | Vancomycin hydrochloride from Streptomyces orientalis | Cancocin hydrochloride                                                                                                  |
| 08 | G09 | 5-hydroxydecanoic acid sodium        |                                                                                   | 16 | G09 | WB 64                                                 | N,N'-Tetramethyl-bis[(1,8-naphthylimid-9-yl)propyl]-N,N'-hexane-1,6-diyl-bis-ammonium bromide                           |
| 08 | G10 | NSC 95397                            | 2,3-bis[(2-Hydroxyethyl)thio]-1,4-naphthoquinone                                  | 16 | G10 | Xylometazoline hydrochloride                          | 2-(4-tert-Butyl-2,6-dimethylbenzyl)-2-imidazoline hydrochloride                                                         |
| 08 | G11 | IMID-4F hydrochloride                | 2-[N-(2,6-dichlorophenyl)-N-(4-fluorobenzyl)amino]-2-imidazoline hydrochloride    | 16 | G11 | Olprinone hydrochloride                               | Loprinone hydrochloride; 1,2-Dihydro-5-(imidazo[1,2-a]pyridin-6-yl)-6-methyl-2-oxo-3-pyridinecarbonitrile hydrochloride |
| 08 | H02 | GYKI 52466 hydrochloride             | 1-(4-Aminophenyl)-4-methyl-7,8-methylenedioxy-5H-2,3-benzodiazepine hydrochloride | 16 | H02 | Trimethoprim                                          |                                                                                                                         |
| 08 | H03 | 4-Hydroxy-3-methoxyphenylacetic acid | Homovanillic acid; HVA                                                            | 16 | H03 | Tyrphostin AG 126                                     | (3-Hydroxy-4-nitrobenzylidene)malononitrile                                                                             |
| 08 | H04 | 6-Hydroxy-DL-DOPA                    | 2,5-Dihydroxy-DL-tyrosine                                                         | 16 | H04 | 3-Tropanylindole-3-carboxylate methiodide             |                                                                                                                         |
| 08 | H05 | Hispidin                             | 6-(3,4-dihydroxystyryl)-4-hydroxy-2-pyrone                                        | 16 | H05 | U-75302                                               | 6-[6-(3-Hydroxy-1E,5Z-undecadienyl)-2-pyridinyl]-1,5-hexanediol                                                         |
| 08 | H06 | HE-NECA                              | 2-Hexynyl-5'-ethylcarboxamidoadenosine                                            | 16 | H06 | Urapidil, 5-Methyl-                                   | 5-Methyl-6[[3-[4-(o-Methoxyphenyl)-1-piperazinyl]propyl]amino]-1,3-dimethyluracil                                       |
| 08 | H07 | 5-Hydroxyindolacetic acid            | 5-HIAA                                                                            | 16 | H07 | U-101958 maleate                                      | 1-Benzyl-4-aminomethyl-N-[(3'-isopropoxy)-2'-pyridinyl]piperidine maleate                                               |
| 08 | H08 | Hydroxylamine hydrochloride          |                                                                                   | 16 | H08 | (±)-gamma-Vinyl GABA                                  | Vigabatrin                                                                                                              |
| 08 | H09 | R-(+)-8-Hydroxy-DPAT hydrobromide    | (+)-8-Hydroxy-2-(dipropylamino)tetralin hydrobromide                              | 16 | H09 | (R)-(+)-WIN 55,212-2 mesylate                         | (R)-(+)-[2,3-Dihydro-5-methyl-3[(morpholinyl)methyl]pyrrolidine-1,4-benzoxazinyl]-1-naphthalenylmethanone mesylate      |

|    |     |                                   |        |    |     |                            |                                                                                     |
|----|-----|-----------------------------------|--------|----|-----|----------------------------|-------------------------------------------------------------------------------------|
| 08 | H10 | Imazodan                          | Cl 914 | 16 | H10 | Xanthine amine congener    | 8-[4-[[[(2-Aminoethyl)amino]carbonyl]methyl]oxy]phenyl]-1,3-dipropylxanthine        |
| 08 | H11 | R(-)-Isoproterenol (+)-bitartrate |        | 16 | H11 | Zimelidine dihydrochloride | (Z)-3-(4-Bromophenyl)-N,N-dimethyl-3-(3-pyridinyl)-2-propen-1-amine dihydrochloride |

### Supplementary Table S2

Primers used for SYBR-based real-time quantitative RT-PCR analyses.

| Gene                | Primers                                                               | Ann. Temp. | Product size (bp) |
|---------------------|-----------------------------------------------------------------------|------------|-------------------|
| <i>Gapdh</i>        | Fw: 5'- TGCACCACCAACTGCTTAG -3'<br>Rv: 5'- GGATGCAGGGATGATGTTC -3'    | 60 °C      | 177               |
| <i>Runx2</i>        | Fw: 5'- CGGGCTACCTGCCATCAC -3'<br>Rv: 5'- GGCCAGAGGCAGAAGTCAGA -3'    | 60 °C      | 78                |
| <i>Osterix</i>      | Fw: 5'- CTCGTCTGACTGCCTGCCTAG -3'<br>Rv: 5'- GCGTGGATGCCTGCCTTGTA -3' | 60 °C      | 84                |
| <i>Osteocalcin</i>  | Fw: 5'- CCGGGAGCAGTGTGAGCTTA -3'<br>Rv: 5'- AGGCGGTCTTCAAGCCATACT -3' | 60 °C      | 68                |
| <i>Collagen 1a1</i> | Fw: 5'- TGTCCCAACCCCAAAGAC -3'<br>Rv: 5'- CCCTCGACTCCTACATCTTCTGA -3' | 60 °C      | 92                |

Fw, forward; Rv, reverse

Ann. Temp.: Annealing temperature

## Supplementary Figures

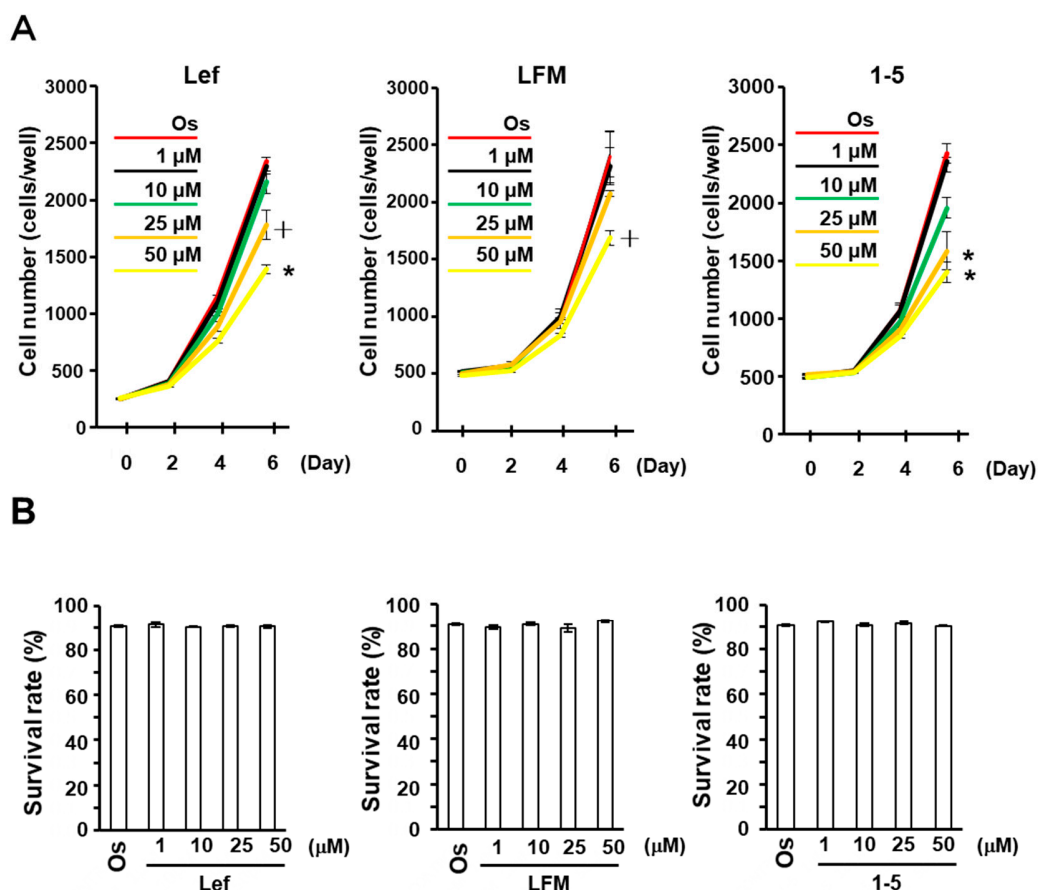

**Supplementary Figure S1.** Effects of identified candidate compounds on cytotoxicity and cell proliferation. **(A)** A cell proliferation assay was performed using MC3T3E1 cells in the presence or absence of leflunomide (Lef), LFM-A13 (LFM), and 1-(5-isoquinolinyisulfonyl)-3-methylpiperazine dihydrochloride (1-5) (1–50  $\mu$ M). The data represent the mean values  $\pm$  standard deviation ( $n=10$ ). Significant differences (+  $P < 0.05$ , \*  $P < 0.01$ ; ANOVA with Dunnett's correction for multiple comparisons) were evaluated in comparison to the control (osteogenic medium alone: Os) values at each time point. **(B)** The CytoTox-Glo luminescent cytotoxicity assay was performed using MC3T3E1 cells in the presence or absence of Lef, LFM, and 1-5 (1–50  $\mu$ M). The number of dead and total cells was evaluated using a dead-cell protease assay and the survival rate of cells (cell viability) was calculated. The data represent the mean values  $\pm$  standard deviation ( $n=3$ ). Significant differences were not detected among the conditions (ANOVA with Dunnett's correction for multiple comparisons).

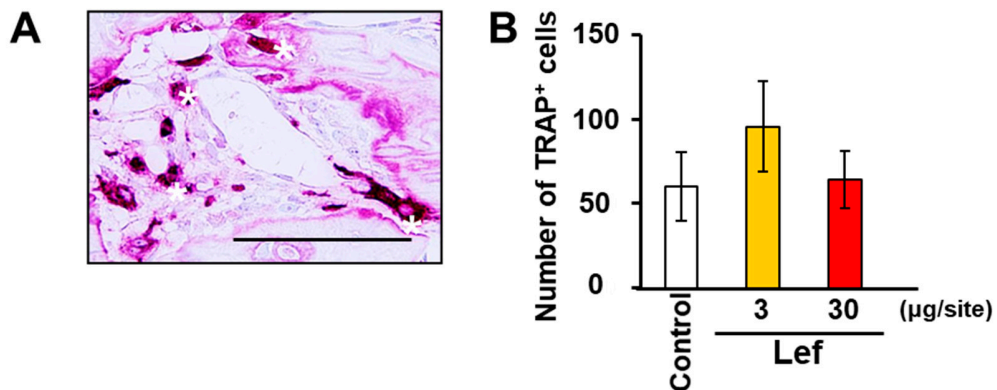

**Supplementary Figure S2.** Histological analysis for the effects of leflunomide (Lef) on osteoclast formation in the rat calvarial bone defect. After the defect (5 mm in diameter) had been formed, collagen graft material containing 0.5 or 5  $\mu$ g of Lef was transplanted into the bone defects. Total 3 or 30  $\mu$ g dosage of Lef was applied to each defect site dividing into 5 injections every three or four days. The same volume of saline was applied to the defect in the control group. At 3 weeks after the surgery, the tissues were collected and stained with tartrate-resistant acid phosphatase (TRAP) staining to count the number of TRAP<sup>+</sup> osteoclasts. **(A)** Histological image of multinucleated osteoclasts (\*) stained with TRAP in the calvarial defects. Bars: 100  $\mu$ m. **(B)** The number of osteoclasts in the bone defects for each condition was counted. The data represent the mean values  $\pm$  standard deviation (n=3). Significant differences were not detected among the conditions (ANOVA with Dunnett's correction for multiple comparisons).
